1 **Honeybees exposure to veterinary drugs: how the gut microbiota is**  
2 **affected**

3

4 **Running title:** Tylosin and Sulphonamides impact honeybees microbiota.

5

6 **L. Baffoni<sup>1</sup>, D. Alberoni<sup>1\*</sup>, F. Gaggia<sup>1</sup>, C. Braglia<sup>1</sup>, C. Stanton<sup>2,3</sup>, P.R. Ross<sup>2,3</sup>, D. Di Gioia<sup>1</sup>**

7 <sup>1</sup>Department of Agricultural and Food Sciences (DISTAL), University of Bologna, Viale Fanin 44,  
8 40127 Bologna, Italy

9 <sup>2</sup>Teagasc Food Research Centre, Moorepark, Fermoy, Co. Cork, Ireland.

10 <sup>3</sup>APC Microbiome Institute, University College Cork, Co. Cork, Ireland

11 **# Corresponding author:** Daniele Alberoni

12 [daniele.alberoni@unibo.it](mailto:daniele.alberoni@unibo.it)

13 +39 3201175257

14

15

16

17

18

19

20

21

22

23

24

25

26

27

28

29

30

31 **Abstract**

32 Several studies have outlined that a balanced gut microbiota offers metabolic and protective functions  
33 supporting honeybee health and performances. The present work contributes to increasing knowledge  
34 on the impact on the honeybee gut microbiota of the administration of three different veterinary drugs  
35 (oxytetracycline, sulphonamides and tylosin). The trial was designed with a semi-field approach in  
36 micro-hives containing about 500 bees, i.e. in experimental conditions as close as possible to real  
37 hives considering the restrictions on the use of antibiotics; 6 replicates were considered for each  
38 treatment plus the control. The absolute abundance of the major gut microbial taxa in newly eclosed  
39 individuals was studied with qPCR and next generation sequencing. Antimicrobial resistance genes  
40 for the target antibiotics were also monitored using a qPCR approach. The results showed that none  
41 of the veterinary drugs altered the total amount of gut bacteria, but qualitative variations were  
42 observed. Tylosin treatment determined a significant decrease of  $\alpha$ - and  $\beta$ -diversity indexes and a  
43 strong the depletion of the rectum population (lactobacilli and bifidobacteria) while favoring the  
44 hindgut population (*Gilliamella*, *Snodgrassella* and *Frischella* spp.). Major changes were also  
45 observed in honeybees treated with sulphonamides, with a decrease in *Bartonella* and *Frischella* core  
46 taxa an increase of *Bombilactobacillus* spp. and *Snodgrassella* spp. Conversely, minor effects were  
47 observed in oxytetracycline treated honeybees. Monitoring of antibiotic resistance genes confirmed  
48 that honeybees represent a great reservoir of tetracycline resistance genes. Tetracycline and  
49 sulphonamides resistant genes tended to increase in the gut microbiota population upon antibiotic  
50 administration.

51

52 **Importance**

53 This study investigates the impact of the three most widely used antibiotics in the beekeeping sector  
54 (oxytetracycline, tylosin and sulphonamides) on the honeybee gut microbiota and on the spread of

55 antibiotic resistance genes. The research represents an advancement to the present literature  
56 considering that tylosin and sulphonamides effect on the gut microbiota has never been studied.  
57 Another original aspect lies in the experimental approach used, as the study looks at the impact of  
58 veterinary drugs and feed supplements 24 days after the beginning of the administration, thus  
59 exploring perturbations in newly eclosed honeybees, instead of the same treated honeybee  
60 generation. Moreover, the study is not performed with cage tests but in micro-hives thus reaching  
61 conditions closer to real hives. The study reaches the conclusion that tylosin and sulfonamides  
62 determine major changes in some core members and that antibiotic resistance genes for tetracycline  
63 and sulphonamides increase upon antibiotic treatment.

64

## 65 **Introduction**

66 Bees have a globally recognized importance for the maintenance of the planet biodiversity and crops  
67 pollination (1, 2). In addition, honeybees are valuable for the production of commercially important  
68 hive products, such as honey, propolis, royal jelly and wax.

69 In the last 150 years, farming practices aimed at increasing livestock productivity have been applied  
70 and antibiotics have played a crucial role (3) in intensive breeding. Honeybees are not an exception  
71 and large-scale apiaries of dozens of beehives have replaced the few hives in the yard of farmers and  
72 wild colonies (4). Moreover, hives are often moved for long distances for agriculture pollination  
73 needs (5; 6) or shipped worldwide for transnational commercialization (7, 8).

74 The intensive exploitation of agricultural systems and pollinators resources (9) contribute to  
75 honeybee stress in such a way that they can no longer survive without constant anthropogenic inputs  
76 (10, 11). Among the biotic and abiotic factors that are affecting honeybee health, pathogens and  
77 parasites play the greatest role. These, acting in synergy with abiotic factors, have caused significant  
78 decline in the European colonies (12, 13).

79 In order to fight microbial pathogens, several antibiotics are used, such as oxytetracycline-HCl

80 (Terramicin<sup>®</sup>) against *Paenibacillus larvae* (14), tylosine (Tylovet<sup>®</sup>) against *Melissococcus plutonius*  
81 (15, 16), and sulphonamides to control both pathogenic bacteria and, partially, Nosemosis, caused by  
82 *Nosema apis* and *Nosema ceranae* (16). The virulence and spread of pathogens are often enhanced by  
83 modern beekeeping practices (17), like the unnatural proximity of colonies (18) and frames exchange  
84 (19).

85 Since the early 2000s, concern about the spread of antibiotic resistance genes among pathogenic  
86 bacteria has led many nations to apply restrictions on their use on livestock (20, 21). In apiculture,  
87 most of the authorizations to trade certain antibiotics have been withdrawn by the European  
88 Commission or by pharmaceutical companies themselves (22, 23). Conversely, antibiotic  
89 administration to honeybees is permitted, in many other countries, even though with restriction and  
90 controls (24, 25), and the European honey market is still threatened by antibiotic residues (26).

91 The honeybee gut microbiota is relatively simple, composed of few core bacterial genera and other  
92 non-core genera with a low or occasional presence (27, 28). Commensal gut bacteria, besides their  
93 role in honeybee nutrition and physiology, act in synergy with the host immune system and play a  
94 role in modulating the insect response to pathogens (29, 30). The honeybee gut microbiota is directly  
95 influenced by various factors such as diet, season and exposure to chemical compounds such as weed  
96 killers or antibiotics (31- 33) and its unbalance, defined as intestinal dysbiosis (34), may negatively  
97 influence honeybee well-being.

98 In this work, we investigated the effect on the honeybee gut microbial community of the most used  
99 veterinary drugs such as oxytetracycline, sulphonamides and tylosin. A number of studies, often based  
100 on cage tests or on hybrid approach between cage test and restricted realise time into the hive, have  
101 considered the impact of oxytetracycline on the honeybee gut microbiota, whereas, to the best of our  
102 knowledge, sulphonamides and tylosin have never been investigated before. This study has been  
103 performed using a semi field approach, *e.g.* in experimental conditions as close as possible to real  
104 hives taking into account the restrictions on the use of antibiotics, thus partially avoiding artificial

105 conditions typical of the cage tests. Perturbation of the gut microbiota in newly eclosed individuals  
106 are explored with the use of qPCR and next generation sequencing (NGS) and antimicrobial  
107 resistance genes for the target antibiotics were monitored.

108

## 109 **Results**

### 110 **General observations on the colonies status pre and post treatment**

111 The trial involved bees treated with tetracycline (PT), sulphonamides (SUL) and tylosin (TL), plus an  
112 untreated control (CTR); each experimental condition was tested with 6 replicates. Bees were  
113 sampled at T0 (experiment beginning) and T1 (24 days later). Samples are therefore expressed as  
114 sampling time – experimental condition – replicate number (e.g.: T0\_CTR\_1). Moreover, the  
115 experiment relied on micro-hives managed with a semi-field approach due to national restriction.

116 The health status of the treated honeybee micro-hives was generally good all over the trial. Only one  
117 micro-hive collapsed (PT\_6) just after the experiment end, presumably due to varroosis, whereas  
118 CTR\_5, PT\_1 and SUL\_1 were found to be queenless during the experiment. Visual evaluation at  
119 the time of gut sampling highlighted a reddish coloration of the intestinal epithelium in the tylosin  
120 treatment group. Drought conditions in the second half of the experiment did not allow nectar  
121 harvest.

122

### 123 **qPCR quantification of total bacteria, *Bifidobacterium* and Lactobacillaceae in the gut**

124 The count of Eubacteria (Fig. 1A) at the beginning and at the end of the experiment showed a  
125 significant decrease (0.65 Log,  $p < 0.05$ ) upon sulphonamide treatment (SUL\_T0 vs SUL\_T1); the  
126 other treatment did not show significant variation. A non-significant decreased was observed in the  
127 control micro-hives (CTR\_T0 vs CTR\_T1) with a loss of 0.21 Log 16S rRNA copies/intestine.  
128 *Bifidobacterium* spp. counts showed a general decrease in all experimental conditions. The reduction  
129 was significant in PT\_T0 vs PT\_T1 (0.58 Log CFU/intestine,  $p < 0.01$ ) and in TL\_T0 vs TL\_T1 (3.61

130 Log CFU/intestine decrease,  $p < 0.01$ ; Fig. 1B). Also, Lactobacillaceae showed a general decrease in  
131 all experimental conditions, which was significant only in the comparison of TL\_T0 vs TL\_T1  
132 ( $p < 0.01$ ) with a decrease of 0.56 Log CFU/intestine (Fig. 1C).

133

#### 134 **Bee Gut microbiota analysis via NGS**

135 A total of 48 samples [2 sampling times, T0 and T1, 4 experimental conditions (CTR, PT, SUL, TL),  
136 6 replicates for each condition, each replicate being a pool of 30 honeybee guts] were subjected to  
137 NGS analysis on Illumina MiSeq platform. About 13.7 million raw reads were obtained from the  
138 sequencing. 9.1 million reads passed the quality control and the Chimera check analysis obtaining an  
139 average of 95,986 joint reads per sample. For statistical analysis, samples were rarefied at 48,400  
140 reads, a value obtained excluding one replicate (TL\_T1\_4) due to a particularly low coverage. The  
141 taxonomical assignment of the 47 samples produced 17,194 OTUs at 97% similarity based on SILVA  
142 132 database. The elaboration of NGS data on the whole dataset is reported in Table 3, where  
143 absolute abundance at phyla, family and genus level are reported per treatment and time, whereas  
144 Fig. 2A reports absolute abundance at genus level per replicate.

145 Detected non-core genus could be mainly ascribed to the genera: *Asaia*, *Apibacter*, *Arsenophonus*,  
146 *Vagococcus*, *Pseudomonas*, *Parasaccharibacter*, *Citrobacter*, *Providencia* and *Pantoea* (Fig. 2B) and  
147 their proportion at T0 and T1 (Fig. 2C).

148  $\alpha$ -diversity indexes (Chao1, Observed OTU and PD whole tree) showed a significant decrease over  
149 time only in tylosin treated group ( $p < 0.01$ ; Fig. S1). The analysis of  $\beta$ -diversity (Table S1) underlined  
150 statistically significant differences in the unweighted UniFrac analysis, which stresses the importance  
151 of taxa presence/absence, only comparing CTR to TL treatment. However, considering the abundance  
152 of taxa in the weighted UniFrac, not only TL treatment resulted significant but also SUL when  
153 compared to CTR (Table S1).

154

## 155 **Antibiotic effect**

156 Control bees did not show any significant shift of the intestinal microbial taxa at the different  
157 taxonomic levels, comparing the two sampling times. A summary of the significant changes from  
158 phyla to species for each antibiotic treatment between the two sampling times level is reported in  
159 Table 2.

160 PT treatment, at phylum level, showed an increase of Firmicutes (from 40.9% at T0 to 47.5% at T1)  
161 and a decrease of Proteobacteria (from 52.2% to 45.6%), although not significant, whereas  
162 Actinobacteria remained stable. At family level, comparing PT\_T1 vs PT\_T0, Bartonellaceae showed  
163 a decreasing trend but not significant (from 8.66% to 7.27%), while both Neisseriaceae and Orbaceae  
164 significantly increased from 3.94% to 7.31% ( $p<0.01$ ) and from 18.5% to 26.7% ( $p<0.05$ ),  
165 respectively. At genus level, *Gilliamella* spp. almost doubled its absolute abundance comparing  
166 PT\_T1 vs PT\_T0 (from 14.07% to 20.84%;  $p<0.05$ ), while *Snodgrassella* significantly increased  
167 (from 4.03 to 7.36;  $p=0.01$ ; Fig. 3D). At species level, PT treatment determined a significant increase  
168 only for *Lactobacillus kullabergensis* ( $p<0.01$ ).

169 Tetracycline resistance gene *tetB* increased significantly of 159% ( $p<0.01$ ) comparing PT\_T1 vs  
170 PT\_T0. However, the increase was also significant comparing CTR\_T1 vs CTR\_T0 ( $p<0.01$ ). Also,  
171 *tetY* drastically increased comparing PT\_T1 vs PT\_T0 ( $p<0.01$ ) whereas CTR did not show any  
172 significant changes.

173 Regarding SUL treatment, at phylum level, Firmicutes showed a significant increase comparing  
174 SUL\_T1 vs SUL\_T0, from 34.1% to 55.2% ( $p<0.05$ ). On the contrary, Proteobacteria decreased  
175 significantly from 59.5% to 38.8% ( $p<0.05$ ). Actinobacteria slightly decreased from 6.31% at T0 to  
176 5.97% at T1 although not significantly. At family level, Bartonellaceae decreased after treatment  
177 (from 39.66% to 5.45%;  $p<0.01$ ) (Fig. 3C), while Neisseriaceae and Acetobacteraceae significantly  
178 increased from 3.21% and 0.67% at T0 to 6.07% and 5.60% at T1, respectively ( $p<0.05$ ).

179 At genus level, SUL treatment at T1 determined a significant decrease in the absolute abundance of

180 *Bartonella* spp. reflecting the proportions reported at family level ( $p < 0.01$ ; Fig. 3A), and *Frischella*  
181 spp. (from 3.20% to 0.98%  $p < 0.05$ ; Fig. 3E). On the other hand, absolute abundance increased in  
182 *Bombilactobacillus* spp. (from 6.13% to 15.74%;  $p < 0.01$ ; Fig. 3C), *Gilliamella* spp. (from 11.18% to  
183 19.56%;  $p < 0.05$ ; Fig. 3F), *Snodgrassella* spp. (from 3.19% to 6.10%;  $p < 0.05$ ; Fig. 3H) and  
184 Other\_genus ( $p < 0.05$ ; Fig. 3I). At species level, a significant increase was reported for *A. kunkeei*  
185 ( $p > 0.05$ ), *Bombilactobacillus mellifer* ( $p < 0.01$ ) and *Bombilactobacillus mellis* ( $p < 0.01$ ). *Bartonella*  
186 *apis*, *Frischella perrara* and *Gilliamella apicola* reflected the genus trend, being the only species  
187 within the respective genus.

188 Sulphonamides resistance gene *sul1* and *sul2* showed a significant increase of 76.84% and 33.95%,  
189 respectively, comparing SUL\_T1 vs SUL\_T0 ( $p < 0.01$ ) respectively, whereas *sul3* did not produce  
190 any amplification at the different annealing temperatures tested (40, 44, 48, 52, 56, 60 and 64 °C).

191 Proteobacteria doubled their abundance comparing TL\_T1 vs TL\_T0, from 42.3% at T0 to 87.4% at  
192 T1 ( $p < 0.01$ ). On the other hand, both Firmicutes and Actinobacteria significantly decreased from  
193 48.5% to 12.6% ( $p < 0.01$ ) and from 9.19% to 0.024% ( $p < 0.01$ ), respectively. Bifidobacteriaceae and  
194 Lactobacillaceae significantly decreased between TL\_T1 and TL\_T0 ( $p < 0.01$ ) with percentage values  
195 that are consistent with those reported below at the genus level. Orbaceae significantly increased  
196 from 16.9% at T0 to 28.5% at T1 (+68.63%,  $p < 0.01$ ). Finally, absolute abundance of Other\_families  
197 significantly increased after TL treatment, from 1.18% at T0 to 7.15% at T1 (+673%,  $p < 0.01$ ).

198 *Bifidobacterium* spp. absolute abundance reduction after TL treatment was highly significant  
199 ( $P < 0.01$ ), decreasing from 9.32% at T0 to 0.02% at T1 (Fig. 3B). In the same way,  
200 *Bombilactobacillus* spp. and *Lactobacillus* spp. decreased from 10.61% and 37.52% at T0 to 0.81%  
201 and 9.37% at T1 ( $p < 0.01$ ; Fig. 3C and 3G), respectively. Moreover, *Bartonella* spp. doubled the  
202 absolute abundance (from 19.18% to 40.96%;  $p < 0.05$ ; Fig. 3A) together with *Gilliamella* spp. and  
203 Other\_genus in TL\_T1, that significantly increased from 14.16% and 1.84% at T0 to 24.90% and  
204 12.40% at T1, respectively ( $p < 0.01$ ; Fig. 3F and 3I). At species level, a significant decrease of six



205 *Lactobacillus* species and also of unclassified *Lactobacillus* spp. was observed ( $p < 0.01$ ), together  
206 with the decrease of *B. mellis* ( $p < 0.01$ ), *B. asteroides* ( $p < 0.01$ ) and *B. indicum* ( $p < 0.05$ ). The Cramer  
207 V test showed a strong biological relevance in pairwise comparisons of TL\_T1 vs TL\_T0 and  
208 SUL\_T1 vs SUL\_T0 (Cramer V = 0.53 and 0.45 respectively) (35). PT\_T1 vs PT\_T0 and CTR\_T1  
209 vs CTR\_T0 biological relevance was moderate (Cramer V = 0.25 and 0.23) but not negligible.  
210 Tylosin resistance gene *tlrB* and *tlrD* did not showed any significant variation in normalized data.  
211 PCA analysis of the dataset at species level PC1 and PC2 together explain only 25% of the  
212 variability. However, TL\_T1 group is clearly separated from TL\_T0 and also from the other treated  
213 samples at T1 (Fig. 4A), particularly along the PC1. Orbaceae and thus *Gilliamella* spp. are  
214 associated with TL\_T1 as also confirmed by statistical analysis (Fig. 4B and 4C). The graph also  
215 shows a clear separation of SUL\_T0 and T1 along PC2.

216

## 217 **Discussion**

218 This work investigates the gut microbial community of honeybees, which have not been treated with  
219 antibiotics for several generations after the supplementation of antibiotics (oxytetracycline,  
220 sulphonamides and tylosin).

221 The observed decrease of total bacterial in treated and control bees could not be ascribed to the  
222 antibiotic treatment, but, rather, it seemed to be related with the bee physiology, or stress due to the  
223 limited freedom. However, the antibiotic exposure significantly influenced some gut microbial  
224 groups.

225 Oxytetracycline is a broad-spectrum antibiotic currently used in the beekeeping sector (24, 36).

226 Recently, Raymann *et al.* (31, 37) showed that the use of tetracycline strongly decreased the absolute  
227 abundance of 5 gut core genera in partially caged honeybees, with a significant decrease of  
228 *Bartonella*, *Bifidobacterium*, *Bombilactobacillus* spp. (formerly known as *Lactobacillus* Firm-4),

229 *Lactobacillus* and *Snodgrassella*. Our findings suggest a possible resilience mechanism to the  
230 disturbance imposed by oxytetracycline since variations were observed only in two core members  
231 (*Bartonella* and *Snodgrassella*) and no significant changes were found in the studied diversity  
232 indexes. It is ascertaining that honeybee gut commensal bacteria provide large reservoirs of  
233 tetracycline resistance determinants (*otr* and *tet* genes) frequently acquired through massive and/or  
234 long-term antibiotic exposure or from other ecosystems shared with animals and humans (38, 39).  
235 Ludvigsen et al. (39) showed that honeybee gut symbionts, in particular *Snodgrassella* spp. and  
236 *Gilliamella* spp., can survive and proliferate thanks to *tet* determinants. Recently, Daisley et al. (40)  
237 found that the routine administration of oxytetracycline increases *tetB* and *tetY* abundance in the gut  
238 microbiota of adult workers associated with a depletion of the major symbiont taxa. The present  
239 study therefore confirms that honeybees represent an impressive reservoir of tetracycline resistance  
240 genes, even after two decades without antibiotic treatment. As already mentioned, our experiments  
241 were performed on the new honeybee generation, differently from other studies that targeted bees of  
242 the same generation (37-38; 40). Beside antibiotic resistant genes uptake, bees, with their daily  
243 activities (hive interaction, flying, flower visiting), have a preferred path to replenish their gut  
244 microbiota. Most of the published studies rely on caged or partially caged honeybees, which limits  
245 social behavior, interactions with the environment but also honeybees queen and brood pheromones  
246 for social regulation and interactions. In addition, our work was performed in micro-hives and,  
247 therefore, the reservoir of microbial inoculants present in the hive structure (stored pollen, nectar and  
248 wax foundation) may have contributed to the mitigation of tetracycline impact.

249 Sulphonamides (SUL) have been widely used in the beekeeping sector from 1960 to 2000, but  
250 residues in honey are still found, thus showing that they are still used in spite of the banning (41).  
251 Among the core genera found in the honeybee gut, *Frischella* and *Bartonella* spp. were significantly  
252 affected by SUL treatment, while *Bombilactobacillus* spp. and *Snodgrassella* spp. increased their  
253 counts. *Frischella perrara* has implications in immune priming in honeybees and in the induction of

254 peptides with antimicrobial activity (42). The registered 3% reduction (with a final 1% abundance in  
255 T1) could be detrimental for the bee defense mechanisms. *Bartonella* spp. has been related to the  
256 recycling of nitrogenous waste products into amino acids and with the degradation of secondary plant  
257 metabolites. The reduction of more than 80% of this taxon could have implication in digestion  
258 functions and in the recovery of amino acids (43). However, it is evident that most of the core  
259 members are not affected by SUL treatment. This can be again a consequence of the uptake of  
260 sulphonamides resistance genes, that was confirmed with both gene *sul1* and *sul2* in this research.  
261 This is coherent with results recently obtained by Cenci-Goga *et al.* (44) that found sulphonamide  
262 resistance genes (*sul1* and *sul2*) in a large number of honeybees sampled in different Italian locations.  
263 Tylosin induced a remarkable change in some microbial taxa proportion, almost causing the depletion  
264 of the rectum population (lactobacilli and bifidobacteria) and favoring the hindgut population (mostly  
265 *Gilliamella*, but also *Snodgrassella* and *Frischella*). It is known that tylosin targets are mainly Gram-  
266 positive bacteria (45; 46). Both *Bifidobacterium*, *Bombilactobacillus* and *Lactobacillus* genera  
267 represented 99.99% of Bifidobacteriaceae and Lactobacillaceae family members that, overall,  
268 accounted for more than a half of the honeybee gut microbial community. They play an essential role  
269 in the transformation of various pollen coat-derived compounds, including flavonoids, phenolamides  
270 and  $\omega$ -hydroxy acids (47), in addition to the complex sugars' breakdown (48, 49). Their rapid  
271 decrease may affect honeybee ability to metabolize specific compounds and consequently reduce  
272 nutrient availability. It is remarkable that macrolide antibiotic resistance genes *tlrB* and *tlrD* did not  
273 increase significantly in treated honeybees at T1, even if detected. This is probably due to the low  
274 occurrence of these antibiotic resistance genes (ARG) in *Bombilactobacillus*, *Lactobacillus* and  
275 *Bifidobacterium* honeybee strains, even if TL resistant strains are described in humans and swine (50,  
276 51). *Tlr* genes belong to the same resistance group of *erm* genes (erythromycin ribosome  
277 methylation), so that *tlrB* is also classified as *erm32* whereas *tlrD* as *ermN* (52, 53). The presence of  
278 *tlr* genes and the lack of decrease upon TL treatment may also be explained by their activity against

279 other macrolide antibiotics that have a broader spectrum of activity, including Gram-negative  
280 bacteria that survived the TL treatment. Jackson et al. (54) found that erm genes can be activated after  
281 tylosin use. Vice versa *tlr* genes might confer resistance to some macrolide in tylosin insensitive  
282 Gram-negative bacteria populating the honeybee gut thus explaining their presence at T0 and T1.  
283 Several studies showed that environmental species, such as members of the *Asaia*, *Apibacter*,  
284 *Apilactobacillus*, *Vagococcus*, *Pseudomonas*, *Parasaccharibacter*, *Citrobacter*, *Providencia* and  
285 *Pantoea* genera, often related with soil, pollen and nectar (55, 56), are detected in the honeybee gut  
286 as minor groups (57-59). These non-core genera were found to increase at T1 upon treatments with  
287 SUL and TL. These microorganisms may increase the pool of ARG, due to their continuous exposure  
288 to antibiotics used in agroecosystem (e.g.: sewage from livestock distributed on soil). For instance,  
289 *Parasaccharibacter apium*, recently reclassified as *Bombella* sp. by Smith et al., (60), is reported as a  
290 strong immune stimulating strain in honeybees, also capable of counteracting *Nosema* sp. (61). The  
291 non-core genera that are sporadically associated with honeybees might play a role in the immune  
292 stimulation or metabolic regulation of honeybees, despite their low abundance. Interestingly, the  
293 limited interaction with the environment did not prevent their acquisition as gut commensal bacteria  
294 over the experimental time.

295 Overall, the three assayed veterinary drugs do not impact quantitatively the gut bacterial community  
296 in terms of total amount of bacteria, but they influence the absolute abundance of several core taxa,  
297 causing a possible lack of metabolic functions related to the most susceptible bacterial species and  
298 strains. A long-term observation of the colony health status, also including the hive development and  
299 hive products (e.g. honey), will allow the understanding of the relationship between the altered  
300 microbial structure and the behaviour and performance of honeybees.

301

## 302 **Experimental Procedure**

### 303 **Experimental design**

304 Due to the European and national law restricting the use of antibiotics or other veterinary drugs as  
305 antimicrobial in open field, these were tested in semi-field conditions, i.e. in micro-hives incubated in  
306 a thermostatic chamber

307 with a limited flying time for honeybees. Honeybees employed in this study have not been treated  
308 with antibiotics for several generations (over two decades).

309 The micro-hives employed in the study were obtained as depicted in Fig. 6A. Shook swarming of a  
310 fully populated and healthy bee hive was used to populate 72 micro-combs (L 9.5 x H 10.5 cm). The  
311 queen was allowed laying eggs for three days on approximately 1/3 of the total available micro-  
312 combs. 5 days later, 24 experimental wooden micro hives (L 20 x H 15 x W 16 cm) were set up,  
313 each containing 3 micro-combs (a brood frame, a honey frame and an empty comb). Each micro hive  
314 contained approximately 500 honeybees with a mated queen. The obtained micro-hives constituted  
315 the experimental replicates (6 for each experimental condition). Moreover, every micro hive was  
316 equipped with an anti-robbing entrance modification, forcing honeybees to walk a “S” path that  
317 discouraged the entrance of robber bees when the micro hives were placed outside.

318 Micro-hives were located into an incubator with controlled temperature and humidity (29°C and 60  
319 RH), and well equipped with a net allowing ventilation on the mini-hive bottom. The micro-hives  
320 were moved outside in the late afternoon (approx. from 5.30 pm to 8.30 pm) every second day in  
321 order to allow the bees to fly freely and defecate. The arrangement of the micro hives outdoor in the  
322 experimental field always followed the same pattern to avoid disorientation and drift. Micro hives  
323 were placed at minimum 2 m distance from each other, and in clusters of 3 units of the same  
324 experimental thesis, oriented in different directions, in an experimental forest well populated by trees.

325 At early night-time, micro-hives were closed and re-allocated in the lab thermostat. Micro hives were

326 fed every two days with a 30 ml 1:1 (w:w) sucrose solution, plus a 5 ml sterile water dispenser. The  
327 day of the antimicrobial treatment, honeybees were treated as described below. The developed  
328 experimental conditions were: [TL] tylosin, [PT] oxytetracycline, [SUL] a mixture of  
329 sulfaquinoxaline and sulfadimethoxine, and the control with no antibiotic administration [CTR].  
330 Details on antibiotics use and concentration are reported below.

331 The trial was carried out between July and August, 2016, where two foraging options were available:  
332 *Metcalfa pruinosa* honeydew in the early august and *Medicago sativa* blooming all along the trial  
333 even if strongly limited by summer drought. The health status (adult honeybee population and brood  
334 size, honey reserves, core colony cohesion, symptoms of viral diseases and varroa infestation) of  
335 honeybee micro hives was periodically assessed, and variations annotated when relevant.

336

### 337 **Treatment preparation, administration and sampling**

338 Antibiotics were administered according to available guideline for each antibiotic (62-64). Details  
339 and concentrations of antibiotics are reported in Table 1. Bees were treated once a week for three  
340 weeks with micro hive feeders containing 30 mL of sugar syrup (1:1 w/w) mixed with the respective  
341 treatment. Finally, in the days after the 3<sup>rd</sup> treatment (days 15-17), at least 50 emerging honeybees per  
342 replicate were marked on the thorax (65) with coloured nail polish non-toxic to bees. Marked  
343 honeybees were sacrificed at day 24, at nurse stage (7-9 days post eclosure) and with a completely  
344 established gut microbiota (66). A pool of 30 bees per replicate (a total of 180 samples/experimental  
345 condition) was picked at the beginning of the experiment (T0) and after 24 days (T1).

346

### 347 **DNA extraction and NGS sequencing**

348 Obtained honeybee gut pools were well homogenised with pestles, with addition of 1400 µl lysis  
349 solution improved with 60 µl proteinase K per pool (20 mg/ml concentration), and glass beads until

350 total destruction of gut epithelial tissues after 1-hour incubation at 55°C. Only 1/4 of the resulting  
351 sludge (450 µl) was used for gut genomic DNA extraction with Quick-DNA Fecal and Soil Microbe  
352 Kit (Zymo Research, California, U.S.A). The 16S rRNA gene amplification and libraries preparation  
353 for Illumina MiSeq platform sequencing were carried out according to [Alberoni et al., \(67\)](#).  
354 Bioinformatic analyses were performed with Qiime1, and representative OTUs blasted against the  
355 most updated SILVA database release 132. The database was implemented inserting full length 16S  
356 rRNA sequences of administered beneficial bacteria. OTUs with less than 0.1% abundance were  
357 discarded.  $\alpha$ -diversity was evaluated using Chao1, Observed OTU and PD whole tree metrics,  
358 whereas  $\beta$ -diversity was evaluated using both weighted and unweighted UniFrac.

359

#### 360 **Quantification of target microbial groups and resistance genes**

361 Total bacteria (Eubacteria), Lactobacillaceae family, *Lactobacillus* spp., *Bombilactobacillus* spp. and  
362 *Bifidobacterium* spp. were quantified with qPCR (StepOne™ Real-Time PCR System, Applied  
363 Biosystems) according to [Baffoni et al., \(68-69\)](#). Data for Lactobacillaceae (*Apilactobacillus* spp.,  
364 *Bombilactobacillus* spp., *Lactobacillus* spp. and *Lactoplantibacillus* spp.) and *Bifidobacterium* spp.  
365 were transformed to obtain the number of microorganism as Log CFU/single intestinal content ([70](#),  
366 [71](#)). For total bacteria data were expressed as Log 16S rRNA copies/intestine ([72](#)). ARG genes *TetB*,  
367 *TetY*, *Sul1*, *Sul2*, *Sul3*, *TlrB* and *TlrD* were quantified according Zhang et al. ([73](#)) . Primers used are  
368 reported in Table 4. Raw data were corrected according to the total DNA quantification. The final  
369 absolute abundance of ARG was normalized according to ([82](#), [83](#)) by dividing the total ARG with the  
370 absolute abundance of total bacteria previously obtained, data reported show the ratio between ARG  
371 and total bacteria.

372

### 373 **Data adjustments and classification of microbial genera**

374 Rarefied biom tables obtained from NGS bioinformatic analysis were used for further data  
375 adjustments: the absolute abundance of each bacteria species was calculated according to [Raymann et](#)  
376 [al.](#), (31), by multiplying absolute abundance data to the corresponding qPCR total amount results,  
377 and normalizing by the copy number of 16S rRNA gene typical of each microbial genus. Moreover,  
378 species belonging to the *Lactobacillus* genus have been recently re-classified (84) but databases for  
379 NGS OTUs assignment were not yet updated with the new classification at the time of the  
380 bioinformatic analysis of the presented data. Therefore, the absolute abundance dataset was manually  
381 curated to assign the former *Lactobacillus* spp. Firm-4 to *Bombilactobacillus* spp. genus and the  
382 former *Lactobacillus kunkeei* and *Lactobacillus plantarum* to the new respective taxonomical  
383 classifications *Apilactobacillus kunkeei* and *Lactoplantibacillus plantarum*. Due to the sequencing  
384 amplicon length ( $\approx 470$  bp) might not be enough to efficiently discriminate among species, the  
385 manual curation was then validated in qPCR with Firm-4 and Firm-5 specific primers (33). The  
386 obtained dataset was used for further graphical and statistical analyses on target genera and species.

387

### 388 **Statistical analysis**

389 Statistical analysis for qPCR and NGS data ( $\alpha$ -diversity and taxon analysis) was performed with the  
390 R software (85) according to [Baffoni et al.](#) (68). Analysis on data normality and homoscedasticity  
391 was performed, therefore normal and homoscedastic data were analysed with ANOVA, non-normal,  
392 homoscedastic data (with normal distribution of residuals) were analysed with glm function, data  
393 with high deviation from normality where analysed with non-parametric Kruskal-Wallis test coupled  
394 with Dunn-test. For  $\beta$ -diversity index, data resulting from QIIME statistical elaboration were  
395 reported. The software calculates the UniFrac distance (weighted and unweighted UniFrac) between  
396 all the pairs of samples in the dataset to create a distance matrix. The statistical significance between



397 groups was subsequently estimated using the Monte Carlo method with the Bonferroni correction.  
398 Post-hoc test among different groups was carried out and Bonferroni's correction was applied. The  
399 post-hoc test considered pairwise comparisons within each experimental condition, taking into  
400 consideration the impact of each treatment over time. Therefore, four comparisons for the semi-field  
401 trial and three comparisons for the *in-field* trial were considered. The control was considered as a  
402 further treatment to monitor and evaluate the normal gut microbial community evolution resulting  
403 from the interaction of honeybees with the environment. Graphs were generated with ggplot2, ggpubr  
404 and Microsoft Excel. Biological relevance of experimental conditions, pairwise compared at their  
405 respective sampling time (T1 vs T0) was computed with Cramér's V (86) relying on packages  
406 rcompanion, vcd, psych, desctools and epitools. Finally, PCA analysis was performed using packages  
407 FactoMineR (87) and factoextra (88), taking into consideration 71 taxa at species level.

408

#### 409 **Data availability**

410 These sequence data have been submitted to NCBI repository under the Sequence Read Archive  
411 (SRA) databases under accession numbers SAMN16442373-SAMN16442378; SAMN16442391-  
412 SAMN16442396; SAMN16442397-SAMN16442402; SAMN16442409-SAMN16442414;  
413 SAMN16442427-SAMN16442432; SAMN16442444-SAMN16442449; SAMN16442450-  
414 SAMN16442455 and SAMN16442462-SAMN16442467, Bio project n° PRJNA669646.  
415 Supplementary data, including excel files of elaborated data obtained from qPCR for target microbial  
416 groups and ARG and NGS data categorized at phyla, family and genera level, can be found at the  
417 Dryad Digital Repository (DOI.....).

418

419

#### 420 **Compliance with ethical standards**

421 This article does not contain any studies with human participants by any of the authors and  
422 experiments on animals were performed according to the Italian laws that allows experiments on  
423 arthropods without the need of an official ethical commission approval, unless cephalopods are used.

424

#### 425 **Acknowledgments**

426 The research was partially funded by the EU project “NOurishingPROBiotics to bees to Mitigate  
427 Stressors” (NO PROBLEMS), H2020-MSCA-RISE 2017, GA 77760, 2018-2022. The founder had no  
428 role in the study design, data collection and interpretation, or the decision to submit the work for  
429 publication.

430 **Competing interests:** The authors declare no competing interests.

431

#### 432 **References**

433 1. Faheem M, Aslam M, Razaq M. 2004. Pollination ecology with special reference to insects a  
434 review. *J Res Sci* 4:395-409.

435

436 2. Ollerton J, Winfree R, Tarrant S. 2011. How many flowering plants are pollinated by animals?  
437 *Oikos* 120:321-326.

438

439 3. Laxminarayan R, Van Boeckel T, Teillant A. 2015. The economic costs of withdrawing  
440 antimicrobial growth promoters from the livestock sector. *OECD Food Agri Fish* 78.

441

442 4. Daberkow S, Korb P, Hoff F. 2009 Structure of the US beekeeping industry: 1982–2002. *J Econ*  
443 *Entomol* 102: 868-886.

444

- 445 5. Kellar BM. 2018. Honey bees and apple trees: Hood River Oregon as a case study for the creation  
446 of the honey bee pollination industry. Oregon State University Archive, OR.  
447
- 448 6. Sáez A, Aizen MA, Medici S, Viel M, Villalobos E, Negri P. 2020. Bees increase crop yield in an  
449 alleged pollinator-independent almond variety. *Sci Rep* 10:1-7.  
450
- 451 7. Shimanuki H, Knox DA. 1997. Bee health and international trade. *Revue scientifique et technique-*  
452 *Office international des epizooties* 16:172-182.  
453
- 454 8. Zammit-Mangion M, Meixner M, Mifsud D, Sammut S, Camilleri L. 2017. Thorough  
455 morphological and genetic evidence confirm the existence of the endemic honey bee of the Maltese  
456 Islands *Apis mellifera ruttneri*: recommendations for conservation. *J Apicult Res* 56:514-522.
- 457 9. Aizen MA, Harder LD. 2009. The global stock of domesticated honey bees is growing slower than  
458 agricultural demand for pollination. *Curr Biol* 19:915-918.  
459
- 460 10. Fontana P, Costa C, Di Prisco G, Ruzzier E, Annoscia D, Battisti A, Caoduro G, Carpana C,  
461 Contessi A, Dal Lago A, Dall'Olio R, De Cristofaro A, Felicioli A, Floris I, Fontanesi L, Gardi T,  
462 Lodesani M, Malagnini V, Manias L, Manino A, Marzi G, Massa B, Mutinelli F, Nazzi F,  
463 Pennacchio F, Porporato M, Stoppa G, Tormen T, Valentini M, Segrè A. 2018. Appeal for  
464 biodiversity protection of native honey bee subspecies of *Apis mellifera* in Italy San Michele  
465 all'Adige declaration. *Bul Insectology* 71:257-271.  
466
- 467 11. Requier F, Garnery L, Kohl PL, Njovu HK, Pirk CWW, Crewe RM, Steffan-Dewenter I. 2019.  
468 The conservation of native honey bees is crucial. *Trends Ecol Evolut* 34:789-798.  
469

- 470 12. Moritz RF, Erler S. 2016. Lost colonies found in a data mine: global honey trade but not pests or  
471 pesticides as a major cause of regional honeybee colony declines. *Agr Ecosyst Environ* 216:44-50.  
472
- 473 13. Maini S, Medrzycki P, Porrini C. 2010. The puzzle of honey bee losses: a brief review. *Bull*  
474 *Insectol* 63:153-160.  
475
- 476 14. Genersch E. 2010. American Foulbrood in honeybees and its causative agent *Paenibacillus*  
477 *larvae*. *J Invertebr Pathol* 103:10-19.  
478
- 479 15. Hitchcock JD, Moffett JO, Lockett JJ, Elliott JR. 1970. Tylosin for control of American  
480 foulbrood disease in honey bees. *J Econ Entomol* 63:204-207.  
481
- 482 16. Reybroeck W, Daeseleire E, De Brabander HF, Herman L. 2012. Antimicrobials in beekeeping,  
483 *Vet Microbiol* 158:1-11.  
484
- 485 17. Gordon R, Bresolin-Schott N, East IJ. 2014. Nomadic beekeeper movements create the potential  
486 for widespread disease in the honeybee industry. *Aust Vet J* 92:283-290.  
487
- 488 18. Nolan MP, Delaplane KS. 2017. Distance between honey bee *Apis mellifera* colonies regulates  
489 populations of *Varroa destructor* at a landscape scale. *Apidologie* 48:8-16.  
490
- 491 19. Zanet S, Battisti E, Alciati R, Trisciuglio A, Cauda C, Ferroglio E. 2019. *Nosema ceranae*  
492 contamination in bee keeping material: the use of ozone as disinfection method. *J Apicult Res* 58:62-  
493 66.  
494

- 495 20. Tang KL, Caffrey NP, Nóbrega DB, Cork SC, Ronksley PE, Barkema HW, Polachek AJ,  
496 Ganshorn H, Sharma N, Kellner JD, Ghali WA. 2017. Restriction in the use of antibiotics in food  
497 animals and antibiotic resistance in food animals and humans—a systematic review and meta-analysis.  
498 University of Calgary, Canada. In: WHO guidelines on use of medically important antimicrobials in  
499 food-producing animals, WHO. <https://www.ncbi.nlm.nih.gov/books/NBK487956/>  
500
- 501 21. World Health Organization. 2017. WHO guidelines on use of medically important antimicrobials  
502 in food-producing animals: web annex A: evidence base. No. WHO/NMH/FOS/FZD/17.2.  
503
- 504 22. Commission Regulation EU. 2010. No, 37/2010 of 22 December 2009 on pharmacologically  
505 active substances and their classification regarding maximum residue limits in foodstuffs of animal  
506 origin, with honey bee *Apis mellifera* Foragers. Off J Eur Union 15:1-72  
507
- 508 23. Sneeringer S, Bowman M, Clancy M. 2019. The US and EU Animal Pharmaceutical Industries in  
509 the Age of Antibiotic Resistance. No. 1477-2019-2172.  
510
- 511 24. Underwood R, Traver BE, López-Urbe MM. 2019. Beekeeping management practices are  
512 associated with operation size and beekeepers' philosophy towards in-hive chemicals. *Insects* 10:10.  
513
- 514 25. Cilia L. 2019. The plight of the honeybee: a socioecological analysis of large-scale beekeeping in  
515 the United States. *Sociol Ruralis* 59:831-849.  
516
- 517 26. Reybroeck W. 2018., Residues of antibiotics and chemotherapeutics in honey. *J Apicult Res*  
518 57:97-112.  
519

- 520 27. Kwong WK, Moran NA. 2016. Gut microbial communities of social bees. *Nature Rev Microbiol*  
521 14:374.  
522
- 523 28. Praet J, Aerts M, De Brandt E, Meeus I, Smaghe G, Vandamme P. 2016. *Apibacter mensalis* sp,  
524 nov.: a rare member of the bumblebee gut microbiota. *Int J Syst Evol Microbiol* 66:1645-1651.  
525
- 526 29. Kwong WK, Mancenido AL, Moran NA. 2017. Immune system stimulation by the native gut  
527 microbiota of honey bees. *R Soc O Sci* 4:170003.  
528
- 529 30. Raymann K, Moran NA. 2018. The role of the gut microbiome in health and disease of adult  
530 honey bee workers. *Curr Opin Insect Sci* 26:97-104.  
531
- 532 31. Raymann K, Shaffer Z, Moran NA. 2017. Antibiotic exposure perturbs the gut microbiota and  
533 elevates mortality in honeybees. *PLoS Biology* 15:e2001861.  
534
- 535 32. Motta EV, Raymann K, Moran NA. 2018. Glyphosate perturbs the gut microbiota of honey bees.  
536 *PNAS* 115:10305-10310.  
537
- 538 33. Kešnerová L, Emery O, Troilo M, Liberti J, Erkosar B, Engel P. 2020. Gut microbiota structure  
539 differs between honeybees in winter and summer. *ISME J* 14:801-814.  
540
- 541 34. Sartor RB. 2008. Therapeutic correction of bacterial dysbiosis discovered by molecular  
542 techniques. *PNAS* 105:16413-16414.  
543

- 544 35. Kotrlík JW, Williams HA, Jabor MK. 2011. Reporting and Interpreting Effect Size in  
545 Quantitative Agricultural Education Research. *J Agr Edu* 52:132-142.  
546
- 547 36. Steinhauer N, Saegerman C. 2020. Prioritizing changes in management practices associated with  
548 reduced winter honeybee colony losses for US beekeepers. *Sci Total Environ* 753:141629.  
549
- 550 37. Raymann K, Bobay LM, Moran NA. 2018. Antibiotics reduce genetic diversity of core species in  
551 the honeybee gut microbiome. *Mol Ecol* 27:2057-2066.  
552
- 553 38. Tian B, Fadhil NH, Powell JE, Kwong WK, Moran NA. 2012. Long-term exposure to antibiotics  
554 has caused accumulation of resistance determinants in the gut microbiota of honeybees. *MBio* 3.  
555
- 556 39. Ludvigsen J, Amdam GV, Rudi K, L'Abée-Lund TM. 2018. Detection and characterization of  
557 streptomycin resistance *strA-strB* in a honeybee gut symbiont *Snodgrassella alvi*. and the associated  
558 risk of antibiotic resistance transfer. *Microb Ecol* 76:588-591.  
559
- 560 40. Daisley BA, Pitek AP, Chmiel JA, Gibbons S, Chernyshova AM, Al KF, Faragalla KM, Burton  
561 JP, Thompson GJ, Reid G. 2020. *Lactobacillus* spp, attenuate antibiotic-induced immune and  
562 microbiota dysregulation in honey bees. *Comm Biol* 3:1-13.  
563
- 564 41. Piva S, Giacometti F, Marti E, Massella E, Cabbri R, Galuppi R, Serranio A. 2020. Could honey  
565 bees signal the spread of antimicrobial resistance in the environment? *Lett Appl Microbiol* 70:349-  
566 355.  
567

- 568 42. Emery O, Schmidt K, Engel P. 2017. Immune system stimulation by the gut symbiont *Frischella*  
569 *perrara* in the honey bee *Apis mellifera*. *Mol Ecol* 26:2576-2590.  
570
- 571 43. Segers FH, Kešnerová L, Kosoy M, Engel P. 2017. Genomic changes associated with the  
572 evolutionary transition of an insect gut symbiont into a blood-borne pathogen. *ISME J* 11:1232-1244.  
573
- 574 44. Cenci-Goga BT, Sechi P, Karama M, Ciavarella R, Pipistrelli MV, Goretti E, Elia AC, Gardi T,  
575 Pallottini M, Rossi R, Selvaggi R, Grispoldi L. 2020. Cross-sectional study to identify risk factors  
576 associated with the occurrence of antimicrobial resistance genes in honey bees (*Apis mellifera*) in  
577 Umbria Central Italy. *Environ Sci Poll Res* 1-9.  
578
- 579 45. Westermarck E, Skrzypczak T, Harmoinen J, Steiner JM, Ruaux CG, Williams DA, Eerola E,  
580 Sundback P, Rinkinen M. 2005. Tylosin-responsive chronic diarrhea in dogs. *J Vet Intern Med*  
581 19:177-186.  
582
- 583 46. Yin F, Dong H, Zhang W, Zhu Z, Shang B, Wang Y. 2019. Removal of combined antibiotic  
584 (florfenicol tylosin and tilmicosin) during anaerobic digestion and their relative effect. *Renew*  
585 *Energ* 139:895-903.  
586
- 587 47. Bonilla-Rosso G, Engel P. 2018. Functional roles and metabolic niches in the honey bee gut  
588 microbiota. *Curr Opin Microbiol* 43: 69-76.  
589
- 590 48. Lee FJ, Rusch DB, Stewart FJ, Mattila HR, Newton IL. 2015. Saccharide breakdown and  
591 fermentation by the honey bee gut microbiome. *Environ Microbiol* 17:796–815.  
592



- 593 49. Milani C, Turrone F, Duranti S, Lugli GA, Mancabelli L, Ferrario C, van Sinderen D, Ventura M.  
594 2015. Genomics of the genus *Bifidobacterium* reveals species-specific adaptation to the glycanrich  
595 gut environment. *Appl Environ Microbiol* 82:980–991.
- 596
- 597 50. Whitehead TR, Cotta MA. 2001. Sequence analyses of a broad host-range plasmid containing  
598 *ermT* from a tylosin-resistant *Lactobacillus* sp. isolated from swine feces. *Curr microbiol* 43:17-20.
- 599
- 600 51. Luo C, Hang X, Liu X, Zhang M, Yang X, Yang H. 2015. Detection of *erm(X)*-mediated  
601 antibiotic resistance in *Bifidobacterium longum* subsp. *longum*. *Ann Microbiol* 65:1985-1991.
- 602
- 603 52. Maravic G. 2004. Macrolide resistance based on the *Erm*-mediated rRNA methylation. *Curr Drug*  
604 *Targ Inf Dis* 4:193-202.
- 605
- 606 53. Roberts MC, Sutcliffe J, Courvalin P, Jensen LB, Rood J, Seppala H. 1999. Nomenclature for  
607 macrolide and macrolide-lincosamide-streptogramin B resistance determinants. *Antimic Ag*  
608 *Chemother* 43:2823-2830.
- 609
- 610 54. Jackson CR, Fedorka-Cray PJ, Barrett JB, Ladely SR. 2004. Effects of tylosin use on  
611 erythromycin resistance in enterococci isolated from swine. *Appl Environ Microbiol* 70:4205-4210.
- 612
- 613 55. Álvarez-Pérez S, Lievens B, Fukami T. 2019. Yeast–bacterium interactions: the next frontier in  
614 nectar research. *Trends Plant Sci* 24:393-401.
- 615
- 616 56. Liu H, Macdonald CA, Cook J, Anderson IC, Singh BK. 2019. An ecological loop: host  
617 microbiomes across multitrophic interactions. *Trends Ecol. Evol* 34:1118-1130.

618

619 57. Zhang W, Zhang X, Su Q, Tang M, Zheng H, Zhou X. 2020. Genomic features underlying the  
620 evolutionary transitions of *Apibacter* to honey bee gut symbionts. bioRxiv  
621 <https://doi.org/10.1101/2020.09.30.321786>

622

623 58. Ahn JH, Hong IP, Bok JI, Kim BY, Song J, Weon HY. 2012. Pyrosequencing analysis of the  
624 bacterial communities in the guts of honey bees *Apis cerana* and *Apis mellifera* in Korea. J Microbiol  
625 50:735-745.

626

627 59. Khan KA, Ansari MJ, Al-Ghamdi A, Nuru A, Harakeh S, Iqbal J. 2017. Investigation of gut  
628 microbial communities associated with indigenous honey bee (*Apis mellifera jemenitica*) from two  
629 different eco-regions of Saudi Arabia. Saudi J Biol Sci 24:1061-1068.

630

631 60. Smith EA, Anderson KE, Corby-Harris V, McFrederick QS, Newton IL. 2020. Reclassification  
632 of seven honey bee symbiont strains as *Bombella apis*. BioRxiv  
633 <https://doi.org/10.1101/2020.05.06.081802>

634

635 61. Corby-Harris V, Snyder L, Meador CAD, Naldo R, Mott B, Anderson KE. 2016.  
636 *Parasaccharibacter apium* gen. nov. sp. nov. improves honey bee (Hymenoptera: Apidae) resistance  
637 to Nosema. J Econ Entomol 109:537-543.

638 62. Skinner AA, Parkman JP, Studer MD. 2013. Using terramycin for the prevention of American  
639 foulbrood. University of Tennessee, TN.

640

641 63. Mutinelli F. 2003. Practical application of antibacterial drugs for the control of honey bee  
642 diseases. APIACTA 38:46-49.

643

644 64. Elzen PJ, Westervelt D, Causey D, Ellis J, Hepburn HR, Neumann P. 2002. Method of  
645 application of tylosin an antibiotic for American foulbrood control with effects on small hive beetle  
646 (Coleoptera: Nitidulidae) populations. J Econ Entomol 95:1119-1122.

647

648 65. De Smet L, Hatjina F, Ioannidis P, Hamamtzoglou A, Schoonvaere K, Francis F, Meeus I,  
649 Smaghe G, de Graaf DC. 2017. Stress indicator gene expression profiles colony dynamics and  
650 tissue development of honey bees exposed to sub-lethal doses of imidacloprid in laboratory and field  
651 experiments. PloS one 12: e0171529.

652

653 66. Martinson VG, Moy J, Moran NA. 2012. Establishment of characteristic gut bacteria during  
654 development of the honeybee worker. Appl Environ Microbiol 78:2830-2840.

655

656 67. Alberoni D, Favaro R, Baffoni L, Angeli S, Di Gioia D. 2021. Neonicotinoids in the  
657 agroecosystem: in-field long-term assessment on honeybee colony strength and microbiome. Sci  
658 Total Environ 762:144116.

659

660 68. Baffoni L, Gaggia F, Di Gioia D, Santini C, Mogna L, Biavati B. 2012. A *Bifidobacterium*-based  
661 synbiotic product to reduce the transmission of *C. jejuni* along the poultry food chain. Int J Food  
662 Microbiol 157:156-161.

663

664 69. Baffoni L, Gaggia F, Alberoni D, Cabbri R, Nanetti A, Biavati B, Di Gioia D . 2016. Effect of  
665 dietary supplementation of *Bifidobacterium* and *Lactobacillus* strains in *Apis mellifera* L. against  
666 *Nosema ceranae*. Benef Microbes 7:45-51.

667

- 668 70. Lee ZM, Bussema III C, Schmidt TM. 2009. rrnDB: documenting the number of rRNA and  
669 tRNA genes in bacteria and archaea. *Nucleic Acids Res* 37:D489-D493.  
670
- 671 71. Stoddard SF, Smith BJ, Hein R, Roller BR, Schmidt TM. 2015. rrnDB: improved tools for  
672 interpreting rRNA gene abundance in bacteria and archaea and a new foundation for future  
673 development. *Nucleic Acids Res* 43:D593-D598.  
674
- 675 72. Nadkarni MA, Martin FE, Jacques NA, Hunter N. 2002. Determination of bacterial load by real-  
676 time PCR using a broad-range (universal) probe and primers set. *Microbiol* 148:257-266.  
677
- 678 73. Zhang Y, Wang J, Lu J, Wu J. 2020. Antibiotic resistance genes might serve as new indicators for  
679 wastewater contamination of coastal waters: Spatial distribution and source apportionment of  
680 antibiotic resistance genes in a coastal bay. *Ecol Indic* 114:106299.  
681
- 682 74. Rinttilä T, Kassinen A, Malinen E, Krogus L, Palva A. 2004. Development of an extensive set of  
683 16S rDNA-targeted primers for quantification of pathogenic and indigenous bacteria in faecal  
684 samples by real-time PCR. *J Appl Microbiol* 97:1166–1177.  
685
- 686 75. Castillo M, Martín-Orúe SM, Manzanilla EG, Badiola I, Martín M, Gasa J. 2006. Quantification  
687 of total bacteria enterobacteria and lactobacilli populations in pig digesta by real-time PCR. *Vet*  
688 *Microbiol* 114:165–170.  
689
- 690 76. Muyzer G, DeWaal EC, Uitterlinden AG. 1993. Profiling of complex microbial populations  
691 by denaturing gradient gel electrophoresis analysis of polymerase chain reaction-amplified genes  
692 coding for 16S rRNA. *Appl Environ Microbiol* 59:695–700.

693

694 77. Koike S, Aminov RI, Yannarell AC, Gans HD, Krapac IG, Chee-Sanford JC, Mackie RI. 2010.  
695 Molecular ecology of macrolide–lincosamide–streptogramin B methylases in waste lagoons and  
696 subsurface waters associated with swine production. *Microb Ecol* 59:487-498.

697

698 78. Kernn MB, Klemmensen T, Frimodt-Møller N, Espersen F. 2002. Susceptibility of Danish  
699 *Escherichia coli* strains isolated from urinary tract infections and bacteraemia and distribution of *sul*  
700 genes conferring sulphonamide resistance. *J Antimicrob Chemother* 50:513-516.

701

702 79. Pei R, Kim SC, Carlson KH, Pruden A. 2006. Effect of river landscape on the sediment  
703 concentrations of antibiotics and corresponding antibiotic resistance genes (ARG). *Water*  
704 *Res* 40:2427-2435.

705

706 80. He X, Xu Y, Chen J, Ling J, Li Y, Huang L, Xie G. 2017. Evolution of corresponding resistance  
707 genes in the water of fish tanks with multiple stresses of antibiotics and heavy metals. *Water*  
708 *Res* 124:39-48.

709

710 81. Takahashi S, Tomita J, Nishioka K, Hisada T, Nishijima M. 2014. Development of a prokaryotic  
711 universal primer for simultaneous analysis of Bacteria and Archaea using next-generation  
712 sequencing. *PloS one* 9:e105592.

713

714 82. McKinney CW, Dungan RS, Moore A, Leytem AB. 2018. Occurrence and abundance of  
715 antibiotic resistance genes in agricultural soil receiving dairy manure. *FEMS Microbiol*  
716 *Ecol* 94:fiy010.

717

- 718 83. Chen C, Li J, Chen P, Ding R, Zhang P, Li X. 2014. Occurrence of antibiotics and antibiotic  
719 resistances in soils from wastewater irrigation areas in Beijing and Tianjin China. *Environ Pollut*  
720 193:94-101  
721
- 722 84. Zheng J, Wittouck S, Salvetti E, Franz CM, Harris H, Mattarelli P, O'Toole PW, Pot B,  
723 Vandamme P, Walter J, Watanabe K, Wuyts S, Felis GE, Ganzle MG, Lebeer S. 2020. A taxonomic  
724 note on the genus *Lactobacillus*: description of 23 novel genera emended description of the genus  
725 *Lactobacillus* Beijerinck 1901 and union of Lactobacillaceae and Leuconostocaceae. *Int J Syst Evol*  
726 *Microbiol* 70:2782-2858.  
727
- 728 85. R Core Team. 2020. R: A language and environment for statistical computing. R Foundation for  
729 Statistical Computing Vienna Austria. <https://www.R-project.org/>  
730
- 731 86. Cohen J. 1988. *Statistical Power Analysis for the Behavioral Sciences*. Hillsdale, NJ: Laurence  
732 Erlbaum Associates.  
733
- 734 87. Le S, Josse J, Husson F. 2008. FactoMineR: an R package for multivariate analysis. *J Stat Softw*  
735 25:1-18.  
736
- 737 88. Kassambara A, Mundt F. 2020. Factoextra: extract and visualize the results of multivariate data  
738 analyses. R package version 1.5, 1:337-354.  
739  
740  
741  
742

743 **Tables legends**

744 **Table 1** Antibiotics used in this work, their dosages applied in each treatment per hive in the  
745 presented trials, and recommended doses for full size colonies. All antibiotics or antimicrobial agents  
746 were prepared in 30 mL of sugar syrup and sprayed on, or fed to bees. \*Dose recalculated according  
747 to the colony size of microhives, expressed as mg or  $\mu\text{L}$  of active ingredient dissolved in 30 mL of  
748 sugar syrup. \*\*Total recommended dose for 3 administrations with weekly cadence;

749

750 **Table 2** Significant variation among microbial groups at phyla, family, genus and species level  
751 according to the experimental conditions.

752

753 **Table 3** NGS absolute abundance at phyla, family and genus level, reported per treatment and  
754 sampling time.

755

756 **Table 4** List of primers used in this experiment to carry out quantification of specific microbial  
757 targets, and detection of ARGs.

758

759 **Figure Legends**

760 **Fig. 1A-1C qPCR.** quantification of (A) total bacteria (Eubacteria), (B) *Bifidobacterium* spp. and (C)  
761 *Lactobacillaceae*. Data are expressed in Log CFU/intestine for *Bifidobacterium* spp. and  
762 *Lactobacillaceae*; for Eubacteria data are expressed as Log 16S rRNA copies/intestine. Boxplots  
763 report minimum and maximum values, lower and upper quartile and median. **Antibiotics:** [CTR]  
764 Antibiotics Control, [PT] oxytetracycline, [SUL] sulphonamides, [TL] tylosin.

765

766 **Fig. 2A-2C NGS Absolute Abundance overview.** (A) bar charts reporting the major cumulated  
767 microbial genera per samples and their absolute abundance expressed in percentage. (B) pie-charts  
768 reporting the minor cumulated microbial genera (Other\_taxa) per experimental conditions and  
769 sampling time, expressed in percentage as absolute abundance. (C) average absolute abundance of  
770 Other\_taxa for each treatment in T0 and T1.

771 **Fig. 3A-3F NGS Absolute Abundance at genus level.** Box plots reporting the major microbial  
772 genera expressed for their absolute abundance in percentage, and in relation to experimental  
773 conditions (significant pairwise comparisons \* $p < 0.05$ ; \*\*\* $p < 0.01$ ). Boxplots report minimum and  
774 maximum values, lower and upper quartile and median. **Microbial taxa described:** (A) *Bartonella*  
775 spp., (B) *Bifidobacterium* spp., (C) *Bombilactobacillus* spp., (D) *Commensalibacter* spp., (E)  
776 *Frischella* spp., (F) *Gilliamella* spp., (G) *Lactobacillus* spp., (H) *Snodgrassella* spp., (I) Other\_genus,  
777 for the experimental conditions: [CTR] Control, [PT] oxytetracycline, [SUL] sulphonamides, [TL]  
778 tylosin.

779 **Fig. 4A–4F PCA analysis.** (A) PCA was performed with 71 taxa at species level, confidence ellipses  
780 are shown in the graphs. (B) The graph includes the top seven variables with the highest contrib. (C)  
781 The graph includes the variables with  $\cos^2 > 0.6$ .

782

783 **Fig. 5A-5G Antibiotic resistance gene:** Box plots reporting the AGRs for (A) *tetB*, (B) *tetY* for  
784 tetracycline resistance genes; (C) *sul1* and (D) *sul2* for sulphonamides resistance genes; (E) *tlrB* and  
785 (F) *tlrD* for tylosin resistance genes. The absolute AGR quantification is normalized with the total  
786 16S rRNA gene copies, in relation to experimental conditions (significant pairwise comparisons \* $p <$   
787  $0.05$ ; \*\*\* $p < 0.01$ ).

788

789 **Fig. 6 Experimental Design.** The figure reports the scheme of the tests and the number of bees and



790 beehives used in the trials.

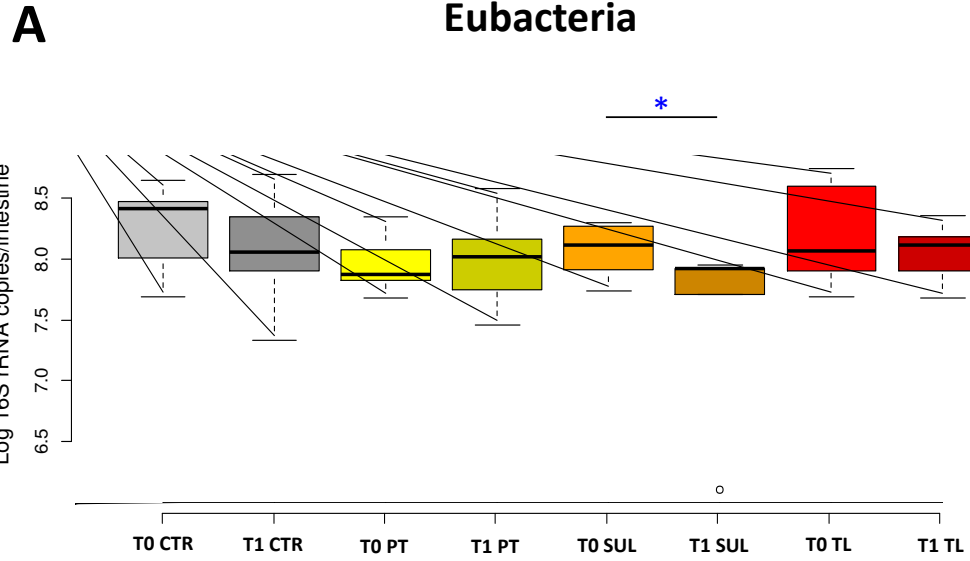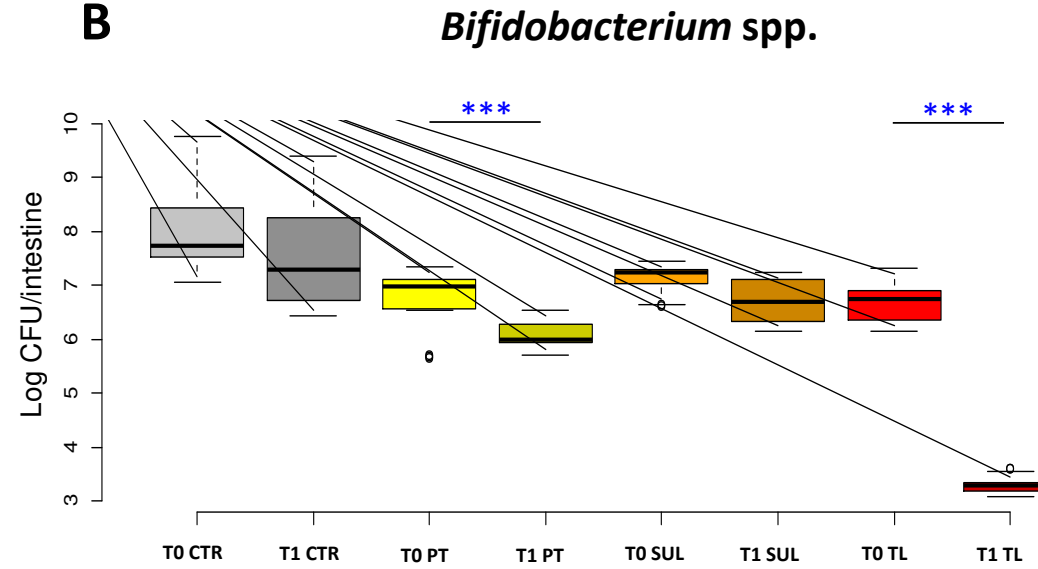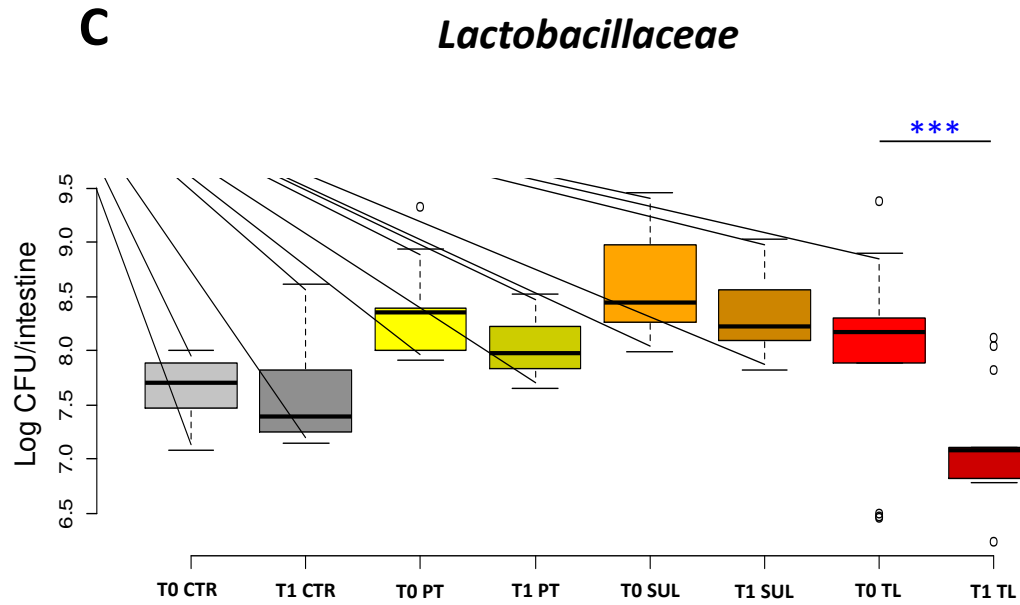

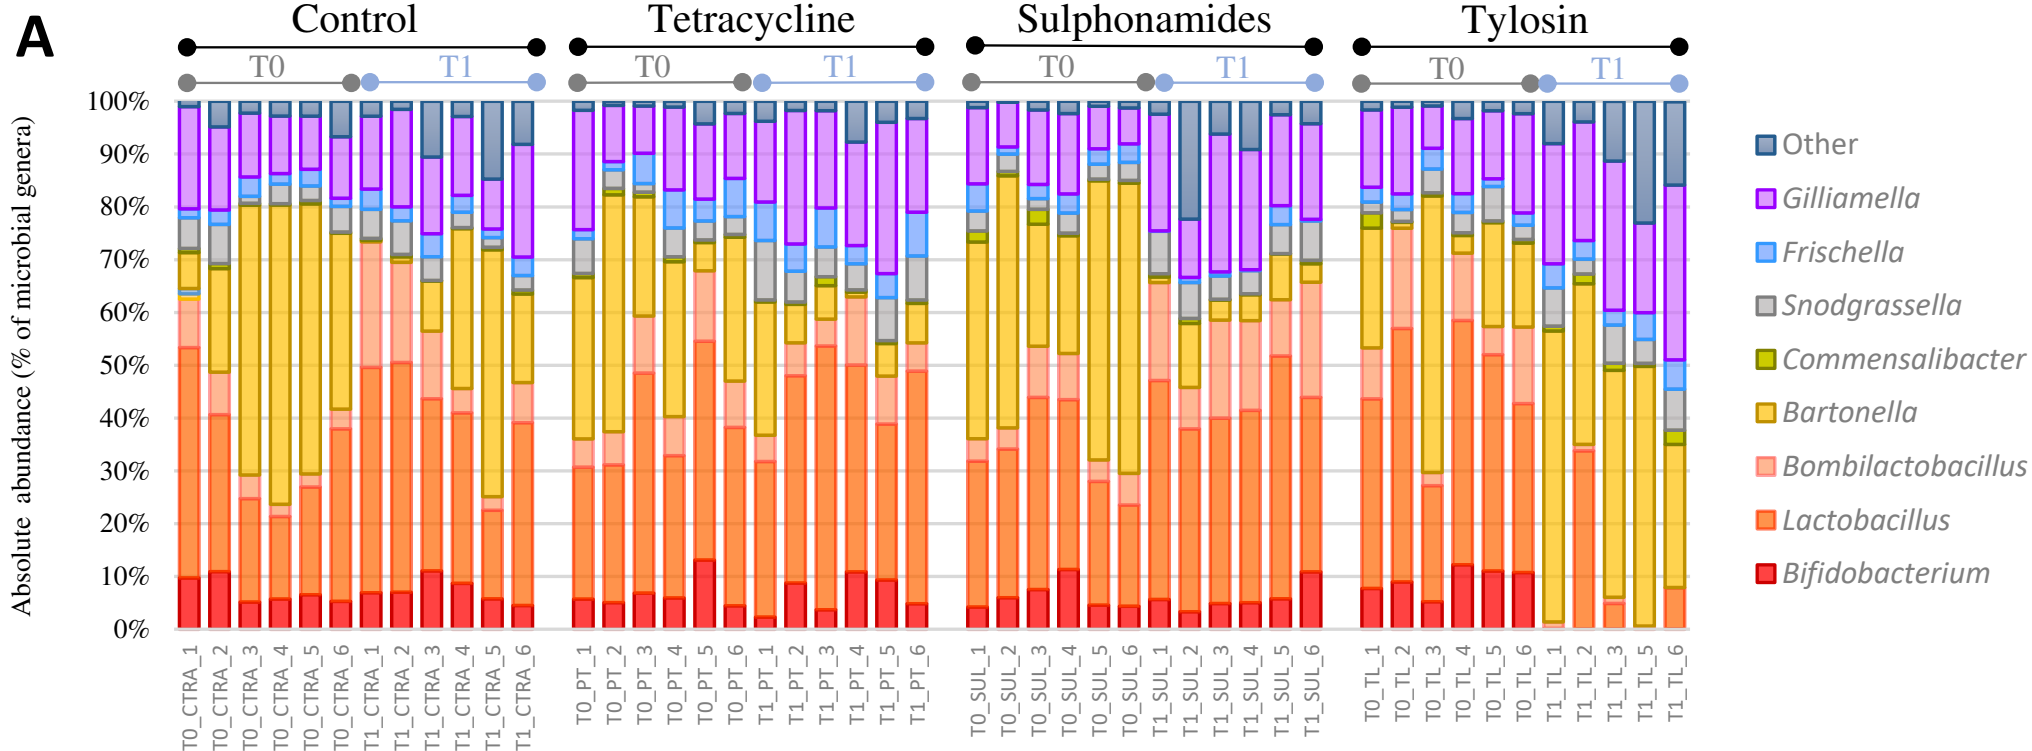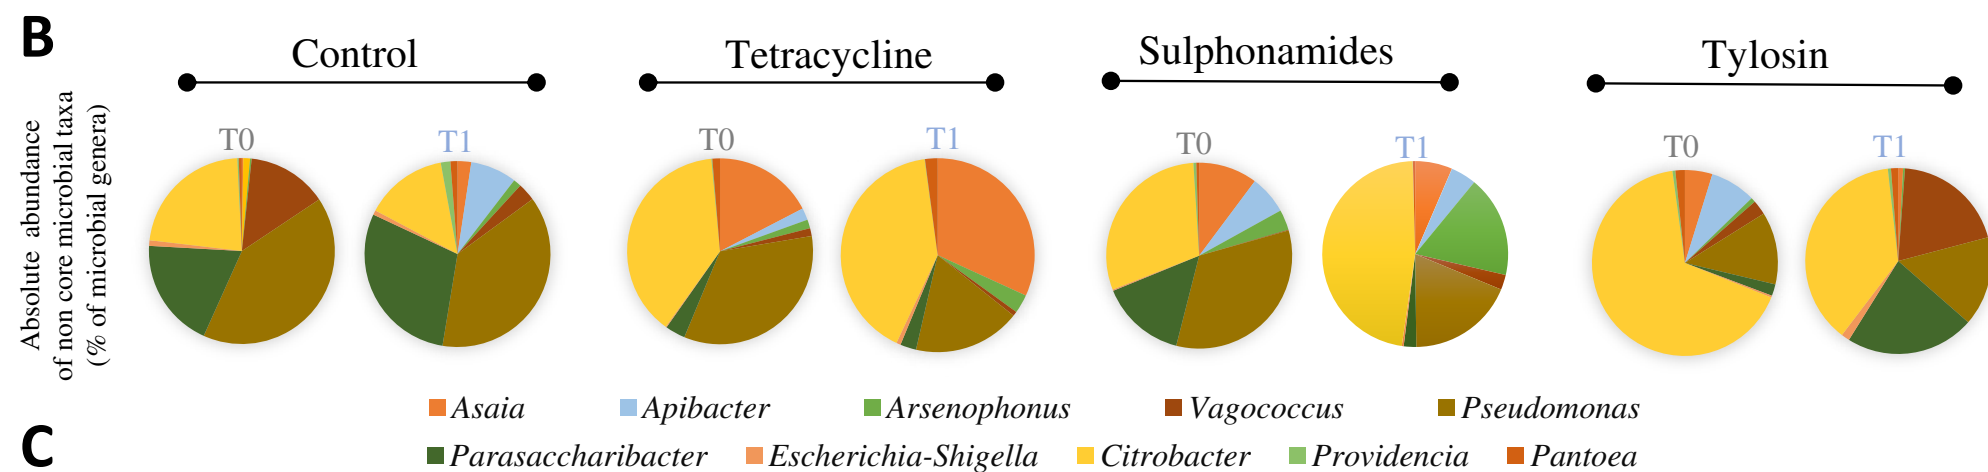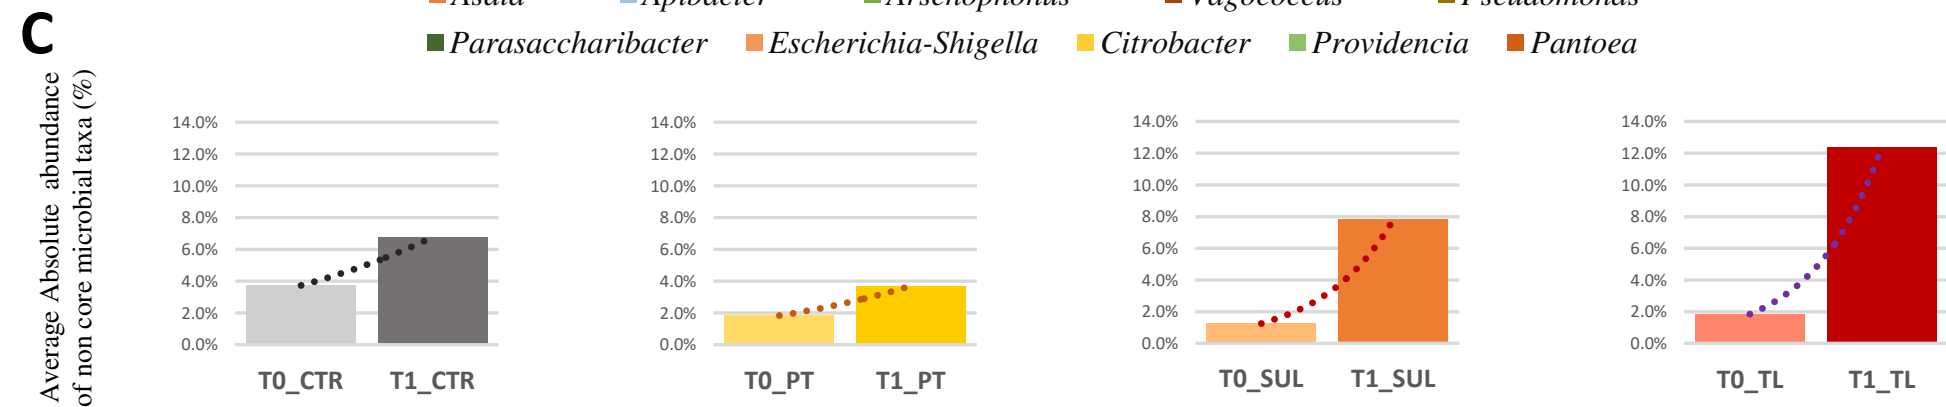

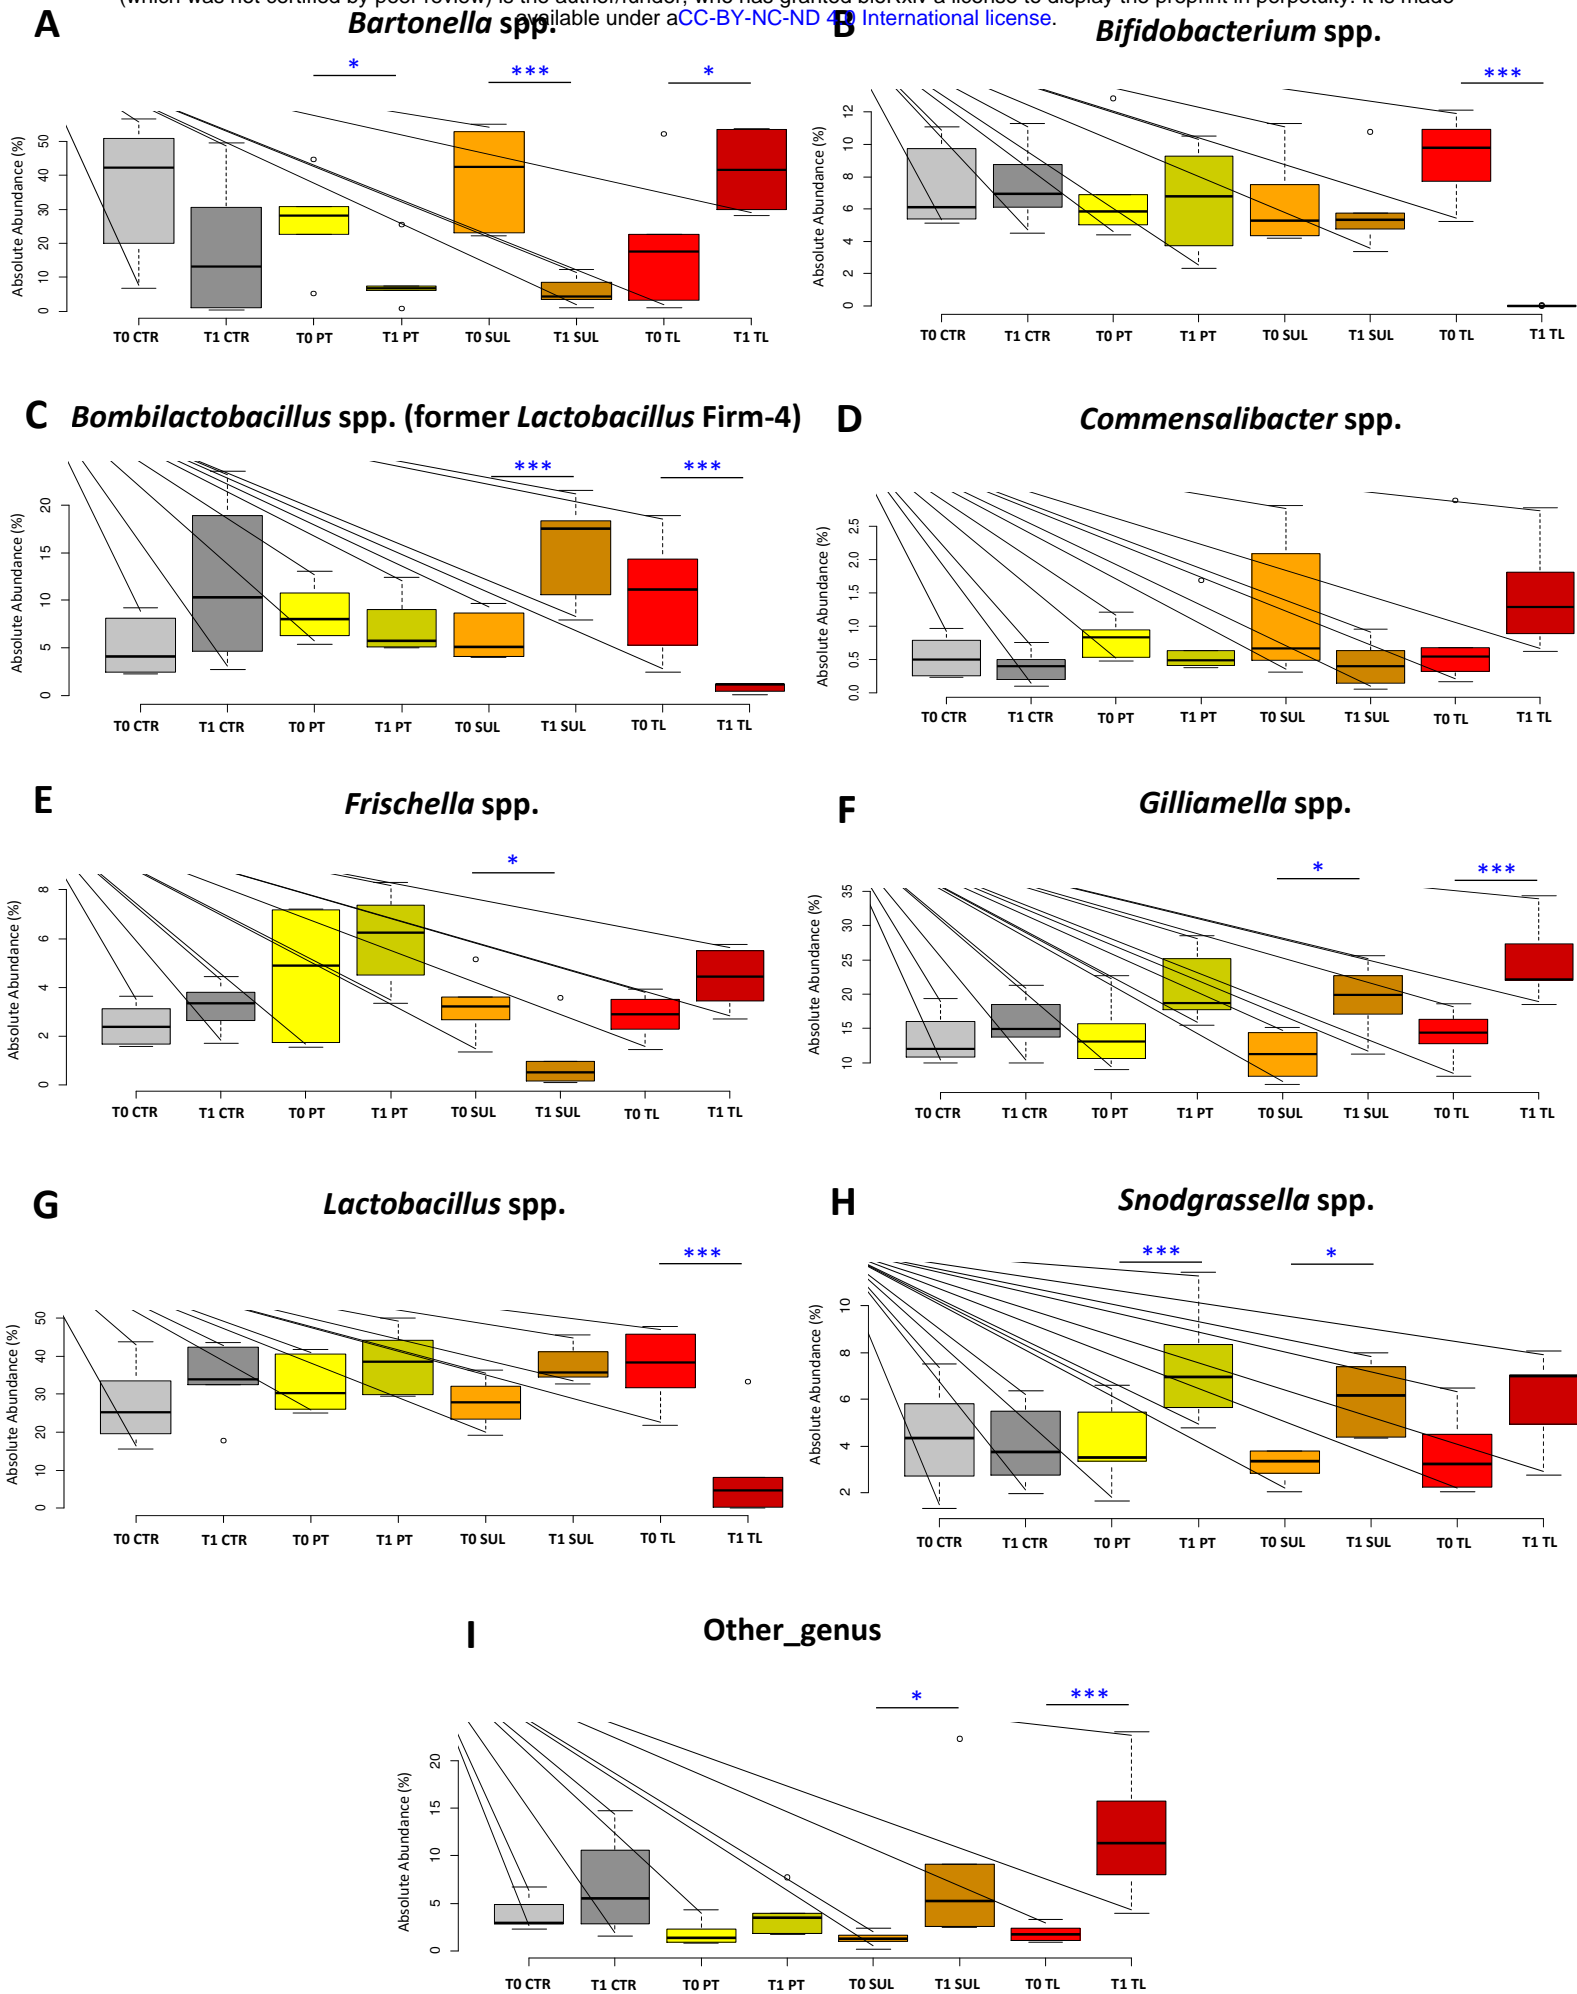

**A**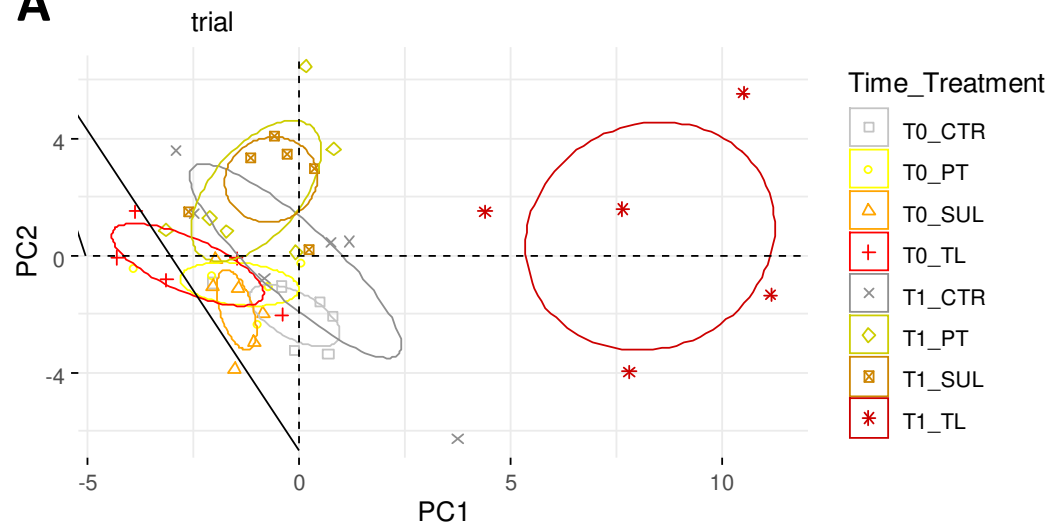**B**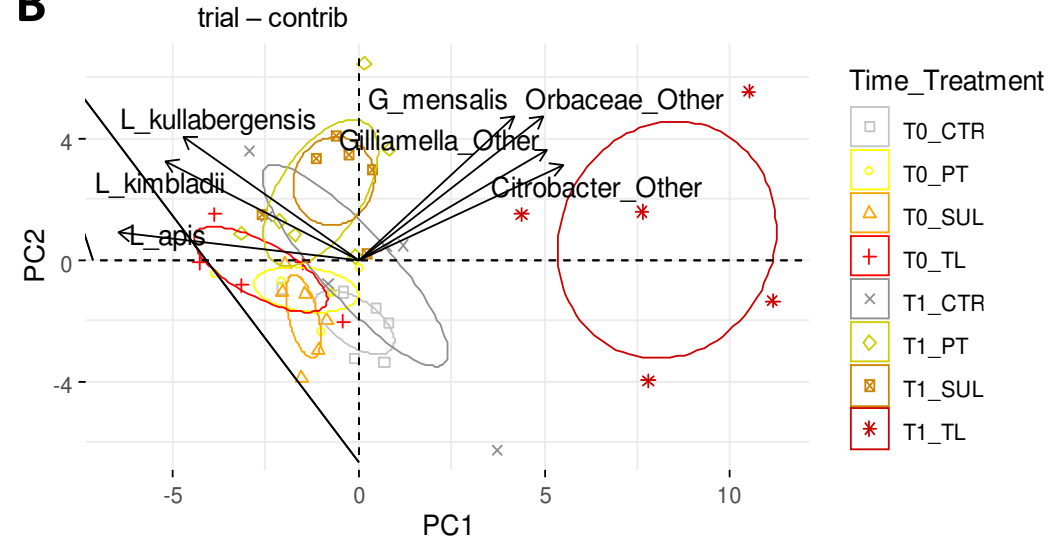**C**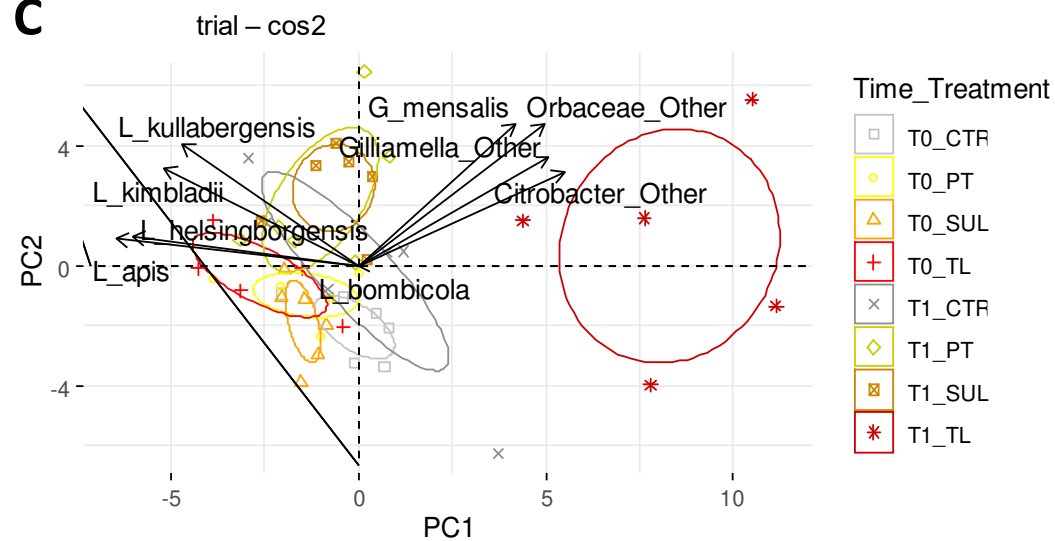

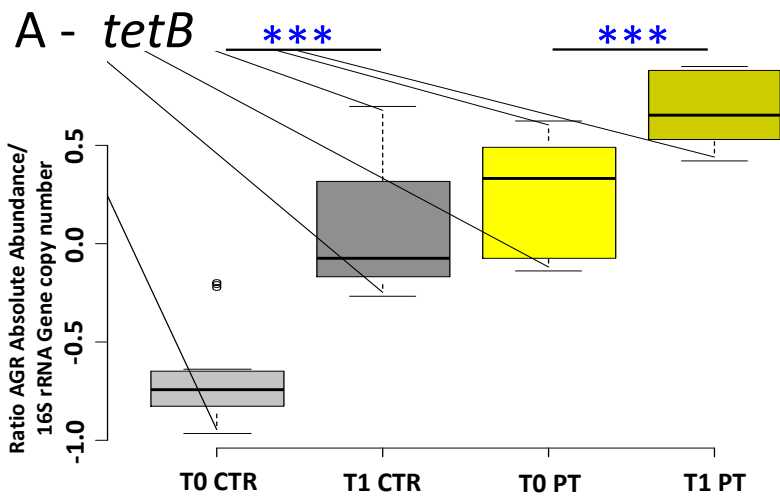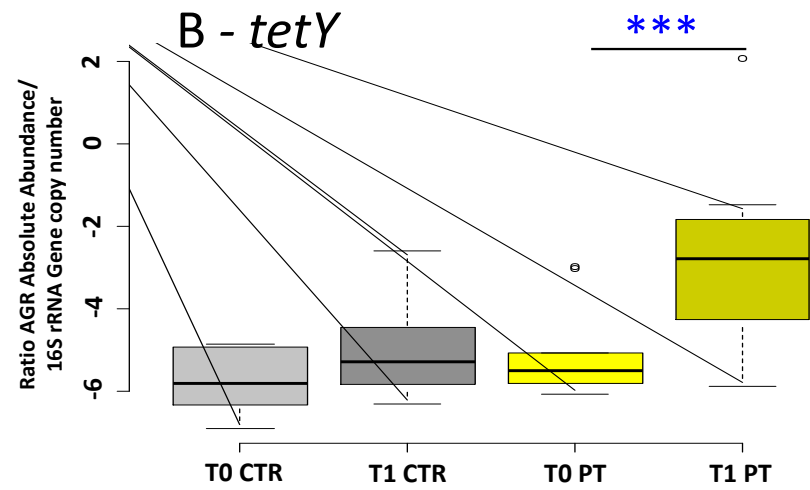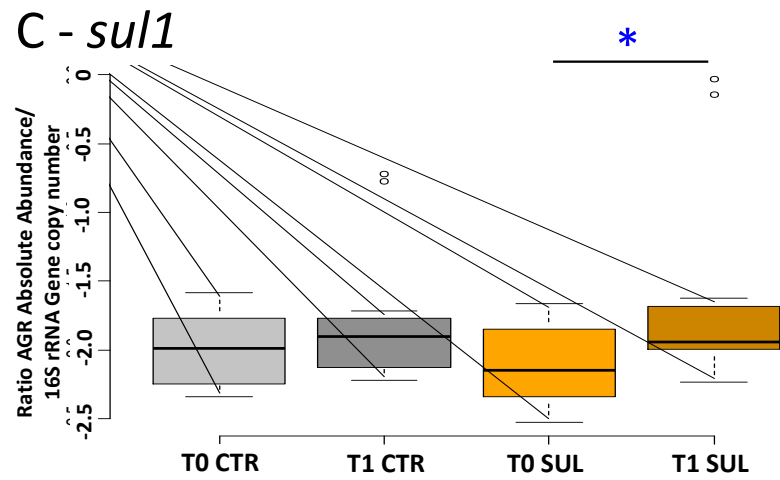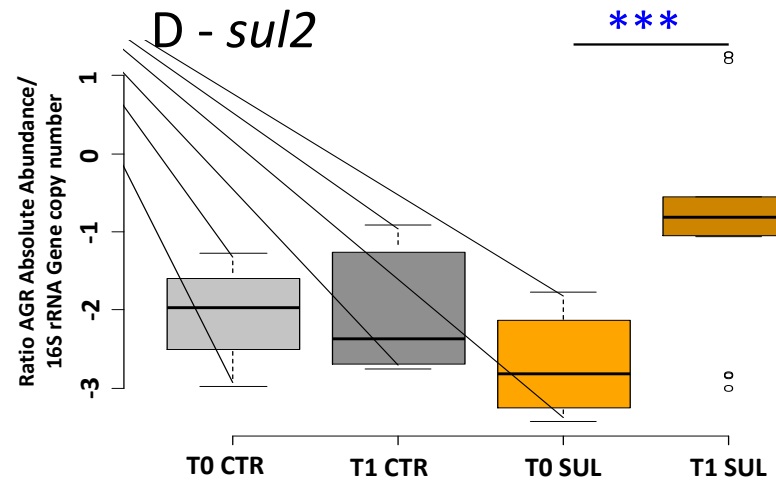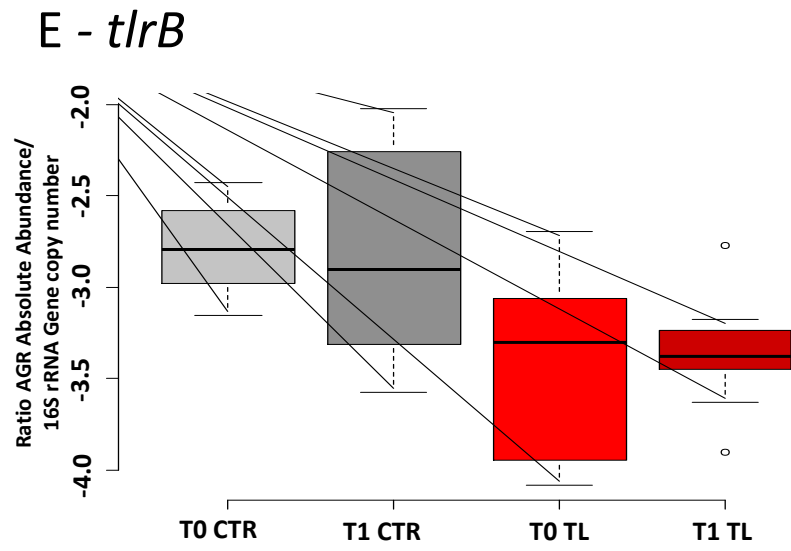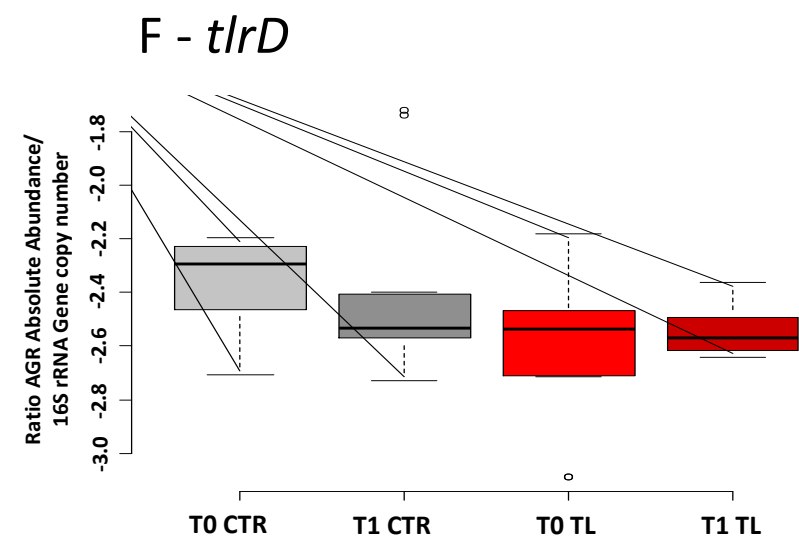

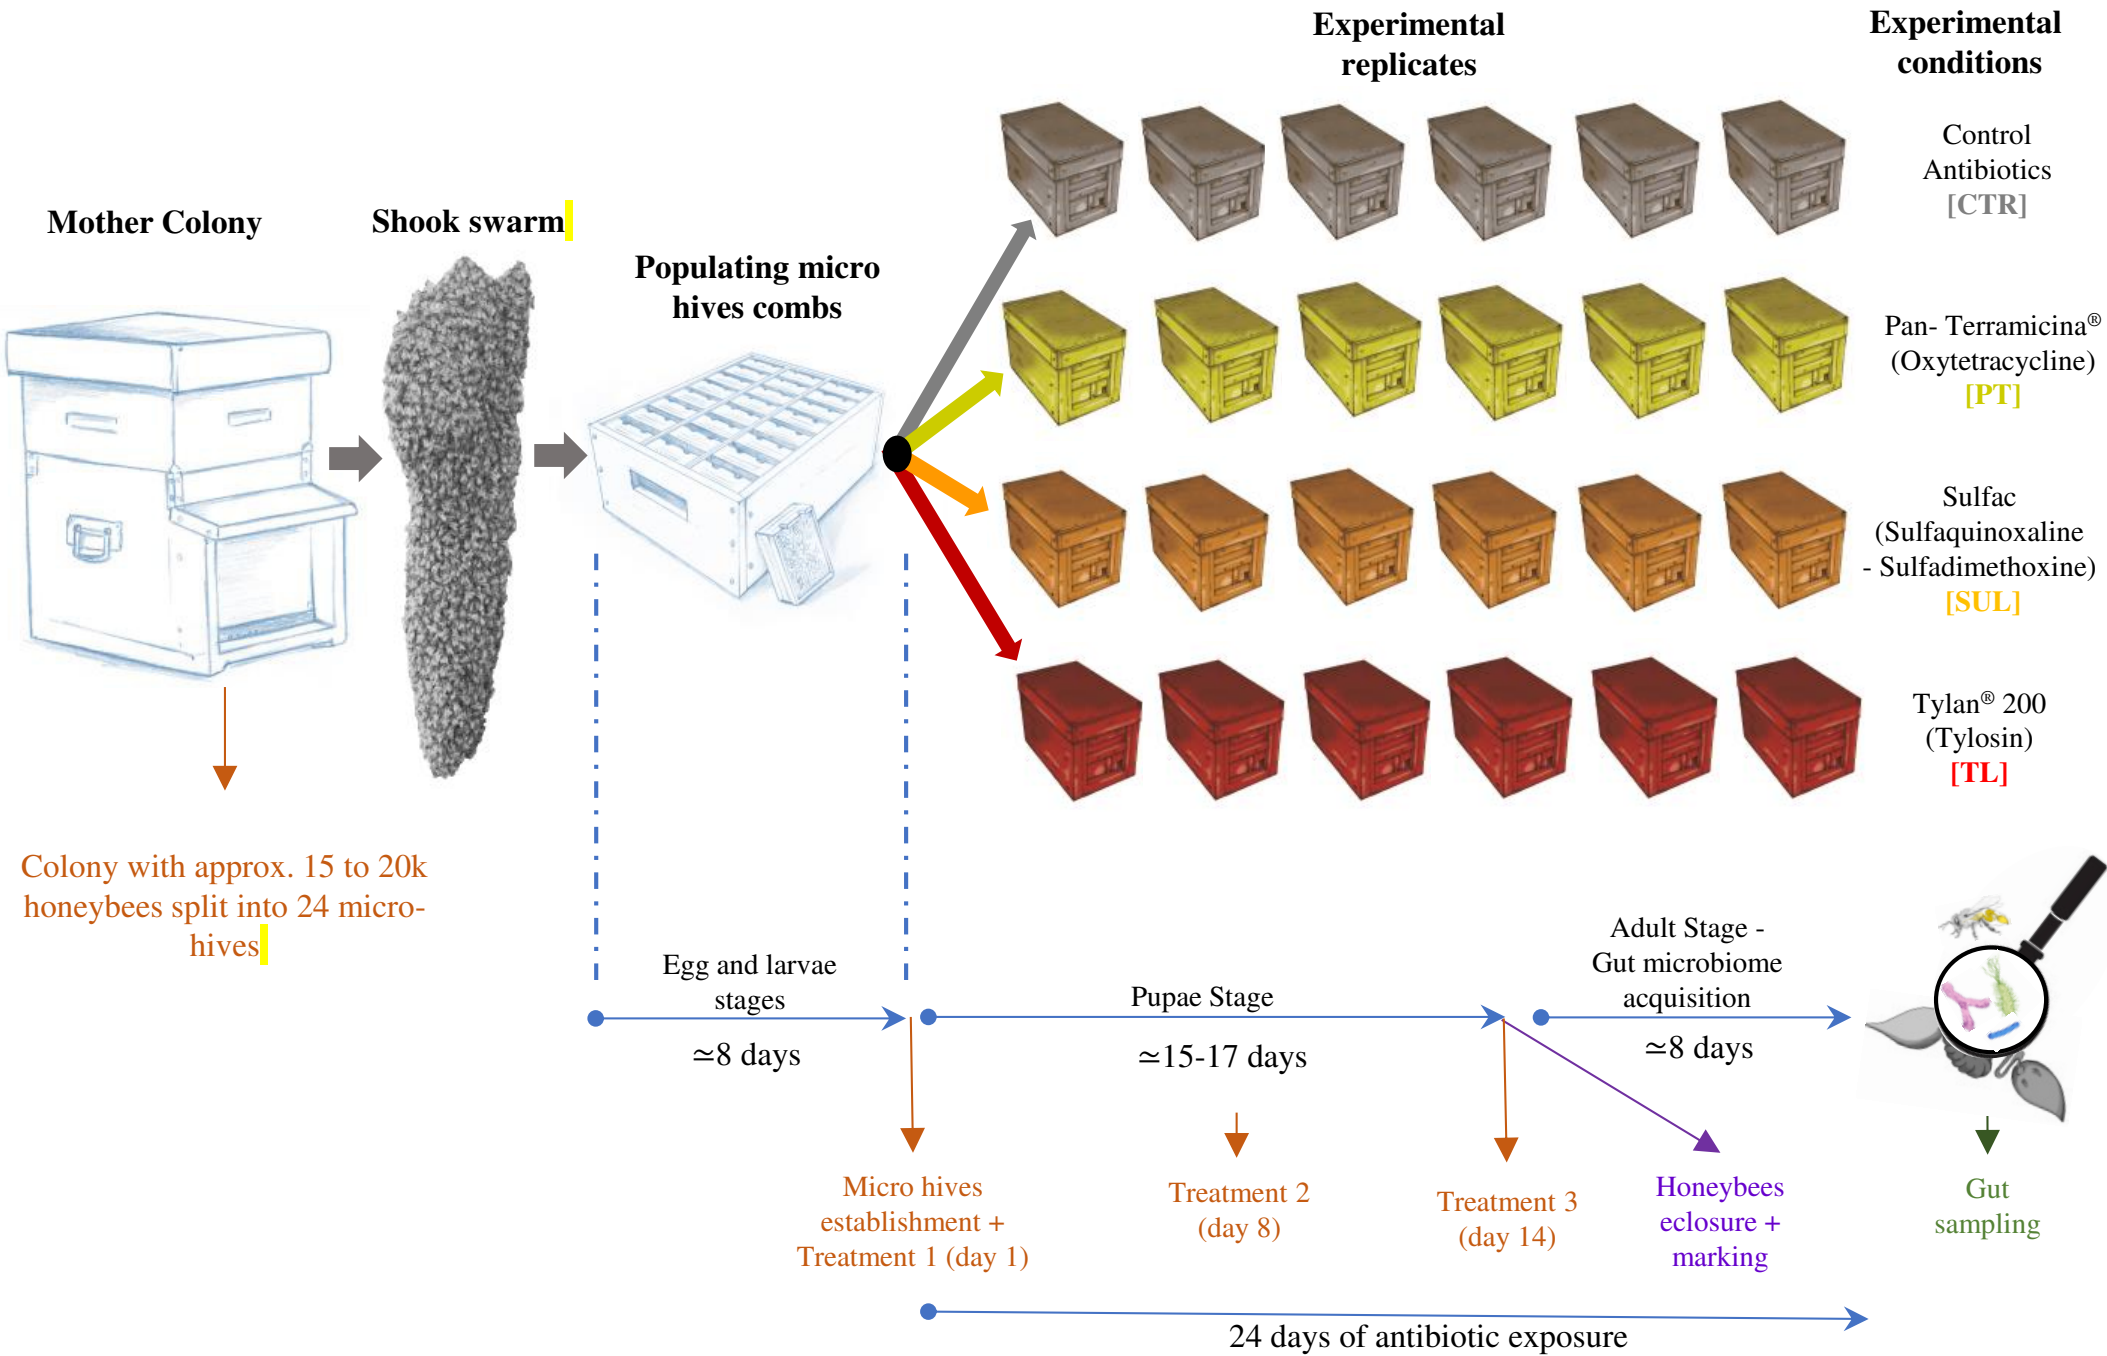

| <i>Antibiotic / Chemotherapics</i> |                                              |                                        |                         |                                                    |                       |
|------------------------------------|----------------------------------------------|----------------------------------------|-------------------------|----------------------------------------------------|-----------------------|
| Experimental Theses                |                                              |                                        | Dose per treatment<br>* | Recommen<br>ded doses<br>for full size<br>colonies | Reference article     |
| Experim<br>ental                   | Active Ingredient                            | Commercial<br>Brand                    |                         |                                                    |                       |
| <b>PT</b>                          | Oxytetracycline HCl                          | Pan-Terramicina <sup>®</sup><br>Zoetis | 13.5 mg                 | 800-1200<br>mg **                                  | <a href="#">62-63</a> |
| <b>TL</b>                          | Tylosin Tartrate                             | Tylan Soluble<br>Elanco <sup>™</sup>   | 10.0 mg                 | 200 mg/7g<br>powdered<br>sugar **                  | <a href="#">64</a>    |
| <b>SUL</b>                         | Sulfaquinoxaline 2% +<br>Sulfadimethoxine 1% | Sulfac Formevet <sup>®</sup>           | 4.5 mg                  | 1 g/3.7L**                                         | <a href="#">63</a>    |
| <b>CTR</b>                         | -                                            | -                                      | -                       | -                                                  | -                     |



|         | SUL                                                                                                                                                                     | TL                                                                                                                                                                                                                                                   | PT                                             | CTR |
|---------|-------------------------------------------------------------------------------------------------------------------------------------------------------------------------|------------------------------------------------------------------------------------------------------------------------------------------------------------------------------------------------------------------------------------------------------|------------------------------------------------|-----|
| Phyla   | Firmicutes ↑<br>Proteobacteria ↓                                                                                                                                        | Actinobacteria ↓<br>Firmicutes ↓<br>Proteobacteria ↑                                                                                                                                                                                                 | Firmicutes ↑                                   |     |
| Family  | Acetobacteraceae ↑<br>Bartonellaceae ↓<br>Neisseriaceae ↑<br>Other_families ↑                                                                                           | Bifidobacteraceae ↓<br>Lactobacillaceae ↓<br>Orbaceae ↑<br>Other_families ↑                                                                                                                                                                          | Neisseriaceae ↑<br>Orbaceae ↑                  |     |
| Genus   | <i>Bartonella</i> ↓<br><i>Bombilactobacillus</i> ↑<br><i>Frischella</i> ↓<br><i>Gilliamella</i> ↑<br><i>Snodgrassella</i> ↑<br>Other genus ↑                            | <i>Bartonella</i> ↑<br><i>Bifidobacterium</i> ↓<br><i>Bombilactobacillus</i> ↓<br><i>Gilliamella</i> ↑<br><i>Lactobacillus</i> ↓<br>Other genus ↑                                                                                                    | <i>Gilliamella</i> ↑<br><i>Snodgrassella</i> ↑ |     |
| Species | <i>A. kunkeei</i> ↑<br><i>Bartonella apis</i> ↓<br><i>B._mellifer</i> ↑<br><i>B._mellis</i> ↑<br><i>Frischella perrara</i> ↓<br><i>G. apicola</i> ↑<br><i>S. alvi</i> ↑ | <i>B. apis</i> ↑<br><i>B. asteroides</i> ↓<br><i>B. indicum</i> ↓<br><i>B. mellis</i> ↓<br><i>G. apicola</i> ↑<br><i>L. apis</i> ↓<br><i>L. helsinborgensis</i> ↓<br><i>L. kimbladii</i> ↓<br><i>L. kullabergensis</i> ↓<br><i>L. melliventris</i> ↓ | <i>L. kullabergensis</i> ↑                     |     |

### Phyla

|                | T0_CTR | T1_CTR | T0_PT | T1_PT | T0_SUL | T1_SUL | T0_TL | T1_TL |
|----------------|--------|--------|-------|-------|--------|--------|-------|-------|
| Actinobacteria | 7,23   | 7,27   | 6,87  | 6,90  | 6,32   | 5,97   | 9,20  | 0,02  |
| Firmicutes     | 32,76  | 45,57  | 40,94 | 47,54 | 34,15  | 55,21  | 48,51 | 12,58 |
| Proteobacteria | 60,01  | 47,16  | 52,18 | 45,55 | 59,54  | 38,82  | 42,29 | 87,40 |

### Family

|                    | T0_CTR | T1_CTR | T0_PT | T1_PT | T0_SUL | T1_SUL | T0_TL | T1_TL |
|--------------------|--------|--------|-------|-------|--------|--------|-------|-------|
| Bifidobacteriaceae | 7,23   | 7,31   | 6,82  | 6,65  | 6,29   | 5,85   | 9,12  | 0,02  |
| Lactobacillaceae   | 32,68  | 46,10  | 40,74 | 45,98 | 34,02  | 53,33  | 48,09 | 13,16 |
| Bartonellaceae     | 36,12  | 17,46  | 26,87 | 8,86  | 39,66  | 5,45   | 19,18 | 40,02 |
| Neisseriaceae      | 4,31   | 3,94   | 3,94  | 7,31  | 3,21   | 6,07   | 3,64  | 5,80  |
| Acetobacteraceae   | 1,58   | 1,88   | 1,83  | 0,90  | 0,67   | 5,60   | 1,89  | 5,32  |
| Orbaceae           | 15,73  | 18,68  | 18,52 | 26,88 | 14,46  | 20,37  | 16,91 | 28,53 |
| Other_Families     | 2,36   | 4,64   | 1,30  | 3,44  | 1,69   | 3,33   | 1,18  | 7,15  |

### Genera

|                     | T0_CTR | T1_CTR | T0_PT | T1_PT | T0_SUL | T1_SUL | T0_TL | T1_TL |
|---------------------|--------|--------|-------|-------|--------|--------|-------|-------|
| Bifidobacterium     | 7,23   | 7,33   | 6,85  | 6,64  | 6,33   | 5,93   | 9,32  | 0,02  |
| Lactobacillus       | 26,94  | 33,75  | 32,49 | 38,57 | 27,82  | 37,78  | 37,52 | 9,37  |
| Bombilactobacillus  | 5,03   | 11,72  | 8,66  | 7,27  | 6,13   | 15,74  | 10,61 | 0,81  |
| Apilactobacillus    | 0,00   | 0,00   | 0,00  | 0,00  | 0,00   | 0,00   | 0,00  | 0,00  |
| Plantilactobacillus | 0,00   | 0,00   | 0,00  | 0,00  | 0,00   | 0,00   | 0,00  | 0,03  |
| Bartonella          | 36,44  | 17,44  | 26,65 | 8,91  | 39,70  | 5,67   | 19,18 | 40,96 |
| Commensalibacter    | 0,53   | 0,38   | 0,80  | 0,68  | 1,17   | 0,43   | 0,86  | 1,47  |
| Snodgrassella       | 4,32   | 3,98   | 4,03  | 7,36  | 3,19   | 6,10   | 3,65  | 5,93  |
| Frischella          | 2,46   | 3,19   | 4,60  | 6,01  | 3,20   | 0,98   | 2,84  | 4,30  |
| Gilliamella         | 13,30  | 15,43  | 14,07 | 20,84 | 11,18  | 19,56  | 14,16 | 24,72 |
| Other_Genera        | 3,74   | 6,78   | 1,84  | 3,71  | 1,26   | 7,81   | 1,84  | 12,40 |

|                                                  | <b>Primer Name</b> | <b>Sequence (5'-3')</b>                                                                                        | <b>Amplicon size</b> | <b>Reference</b> |
|--------------------------------------------------|--------------------|----------------------------------------------------------------------------------------------------------------|----------------------|------------------|
| Bifidobacteriaceae (qPCR)                        | Bif TOT-F          | TCGCGTCYGGTGTGAAAG                                                                                             | 243                  | 74               |
|                                                  | Bif TOT-R          | CCACATCCAGCRTCCAC                                                                                              |                      |                  |
| Lactobacillaceae (qPCR)                          | Lac-F              | GCAGCAGTAGGGAATCTTCCA                                                                                          | 364                  | 75               |
|                                                  | Lac-R              | GCATTYCACCGCTACACATG                                                                                           |                      |                  |
| Eubacteria (qPCR)                                | Eub338-F           | ACTCCTACGGGAGGCAGCAG                                                                                           | 200                  | 76               |
|                                                  | Eub518-R           | ATTACCGCGGCTGCTGG                                                                                              |                      |                  |
| Tylosin resistance gene B                        | Tlr B-F            | GTGTCCTGGAGGAGTTCGAG                                                                                           | 111                  | 77               |
|                                                  | Tlr B-R            | AGCGGAAGTGTGTCCCATAC                                                                                           |                      |                  |
| Tylosin resistance gene D                        | Tlr D-F            | GTCAACGACGACTTCACGAC                                                                                           | 186                  | 77               |
|                                                  | Tlr D-R            | ACTGGGCGTTGAAGAGATTG                                                                                           |                      |                  |
| Sulphonamides resistance 1                       | Sul1-F             | CGGCGTGGGCTACCTGAACG                                                                                           | 433                  | 78               |
|                                                  | Sul1-R             | GCCGATCGCGTGAAGTTCCG                                                                                           |                      |                  |
| Sulphonamides resistance 2                       | Sul2-F             | GCGCTCAAGGCAGATGGCATT                                                                                          | 293                  | 78               |
|                                                  | Sul2-R             | GCCTTTGATACCGGCACCCGT                                                                                          |                      |                  |
| Sulphonamides resistance 3                       | Sul3-F             | TCCGTTACAGCGAATTGGTGCAG                                                                                        | /                    | 79               |
|                                                  | Sul3-R             | TTCGTTACAGCCTTACACCAGC                                                                                         |                      |                  |
| Tetracycline resistance gene B                   | TetB-F             | GGTTGAGACGCAATCGAATT                                                                                           | 206                  | 73               |
|                                                  | TetB-R             | AGGCTTGGAATACTGAGTGTA                                                                                          |                      |                  |
| Tetracycline resistance gene Y                   | TetY-F             | GCTGATATTTGCGGGTTTCTA                                                                                          | 177                  | 80               |
|                                                  | TetY-R             | CGTCAAGCCTGTAAAGTTCC                                                                                           |                      |                  |
| Illumina adapter - V3-V4 Region of 16S rRNA gene | Pro341-F           | AATGATACGGCGACCACCGAGATCT<br>ACACTCTTCCCTACACGACGCTCTT<br>CCGATCTCCTACGGGAGGCAGCAG-<br><b>CCTACGGGNGCASCAG</b> | 560                  | 81               |
|                                                  | Pro805-R           | CAAGCAGAAGACGGCATAACGAGATN<br>NNNNNGTGACTGGAGTTCAGACGT<br>GTGCTCTCCGATCT-<br><b>GACTACNVGGGTATCTAATCC</b>      |                      |                  |
